# Supplementary material for: Thermodynamic and optical properties of HCOOH(H2O)n and HCOOH(NH3)(H2O)(n−1) clusters at various temperatures and pressures: a computational study
Source: Royal Society of Chemistry journal article supplement (doi:10.1039/d2cp03908g), 2023-01-01
Supplement: d2cp03908g1.pdf [file d2cp03908g1.pdf]

# Supporting Information

## **Thermodynamic and Optical Properties of $\text{HCOOH}(\text{H}_2\text{O})_n$ and $\text{HCOOH}(\text{NH}_3)(\text{H}_2\text{O})_{(n-1)}$ Cluster at Various Temperatures and Pressures: A Computational Study**

Arnab Patla and Ranga Subramanian\*

*Department of Chemistry, Indian Institute of Technology Patna, India 801103*

\*Corresponding author. Ranga Subramanian (Email: ranga@iitp.ac.in; Fax: +91-612-3028123)

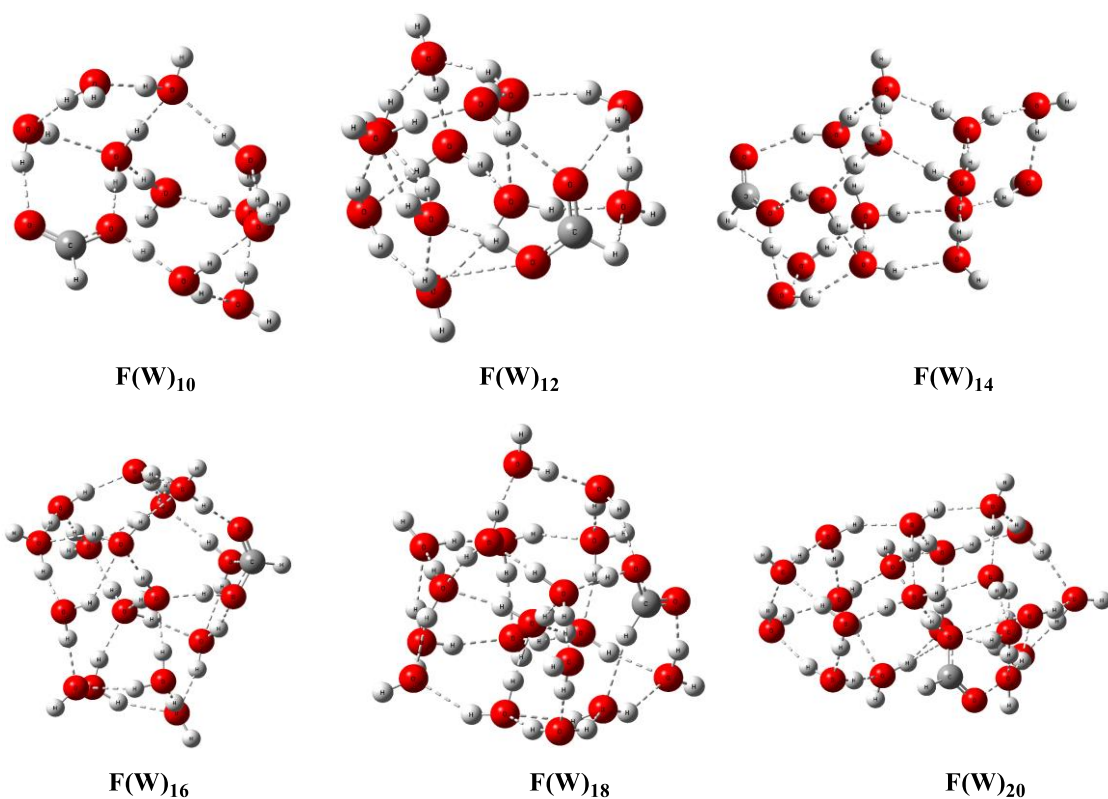

Figure S1. The identified lowest energy structures of  $F(W)_n$  ( $n = 10, 12, 14, 16, 18, 20$ ) clusters. Where  $F = \text{HCOOH}$  and  $W = \text{H}_2\text{O}$ .

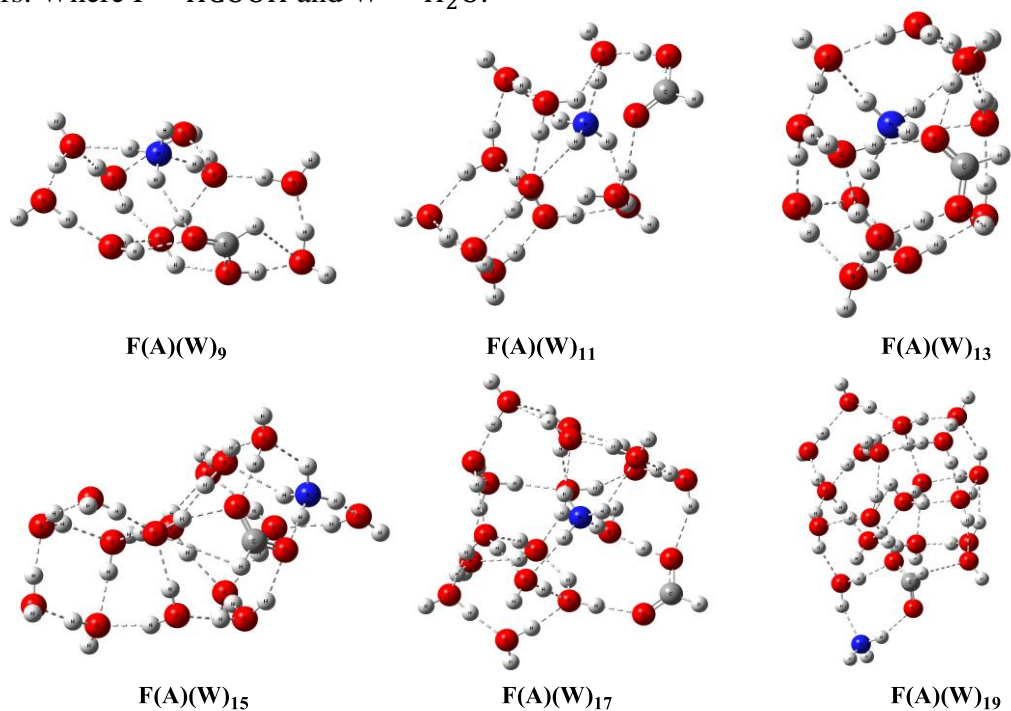

Figure S2. The identified lowest energy structures of  $F(A)(W)_{n-1}$  ( $n = 10, 12, 14, 16, 18, 20$ ) clusters. Where  $F = \text{HCOOH}$ ,  $A = \text{NH}_3$  and  $W = \text{H}_2\text{O}$ .

Table S1. The Cartesian coordinates of  $F(W)_n$ , and  $FA(W)_{n-1}$  ( $n = 1-8, 10, 12, 14, 16, 18, 20$ ) (where  $F = \text{HCOOH}$ ,  $A = \text{NH}_3$ , and  $W = \text{H}_2\text{O}$ ) clusters optimized at the M06-2X/6-31++G(d,p) level of theory.

| $F(W)_1$ |             |             |             |
|----------|-------------|-------------|-------------|
| Symbol   | Coordinate  |             |             |
|          | X           | Y           | Z           |
| C        | -1.19879900 | -0.04667700 | 0.00747100  |
| O        | -0.64894200 | -1.12686300 | 0.00402300  |
| H        | -2.28984200 | 0.07177800  | 0.01313100  |
| O        | -0.58949000 | 1.12736500  | 0.00614700  |
| H        | 0.38750800  | 0.98203500  | -0.00015500 |
| O        | 1.87421700  | 0.01131000  | -0.07885300 |
| H        | 1.37542400  | -0.81986700 | -0.01692700 |
| H        | 2.63342100  | -0.04838700 | 0.50858800  |

  

| $F(W)_2$ |             |             |             |
|----------|-------------|-------------|-------------|
| Symbol   | Coordinate  |             |             |
|          | X           | Y           | Z           |
| C        | -1.63260000 | -0.43095100 | 0.00674500  |
| O        | -0.74381100 | -1.26211000 | 0.03907300  |
| H        | -2.69334700 | -0.71505100 | 0.01662300  |
| O        | -1.47964600 | 0.86803300  | -0.04271700 |
| H        | -0.50424400 | 1.13435400  | -0.04876200 |
| O        | 1.02624800  | 1.55581200  | -0.06603100 |
| H        | 1.58451200  | 0.74460900  | -0.04160800 |
| H        | 1.34454500  | 2.15381900  | 0.61720100  |
| O        | 2.00746800  | -0.92007400 | 0.06402100  |
| H        | 2.49198300  | -1.41080800 | -0.60606900 |
| H        | 1.09007500  | -1.25450300 | 0.06737600  |

  

| $F(W)_3$ |             |             |             |
|----------|-------------|-------------|-------------|
| Symbol   | Coordinate  |             |             |
|          | X           | Y           | Z           |
| C        | 2.12195800  | -0.51666900 | -0.08297500 |
| O        | 1.17504300  | -1.27040700 | 0.04767000  |
| H        | 3.15021700  | -0.89191100 | -0.17814900 |
| O        | 2.07748200  | 0.78736600  | -0.12817800 |
| H        | 1.13786700  | 1.15999500  | -0.02129200 |
| O        | -2.51410300 | 0.67415200  | -0.13753700 |
| H        | -3.01314000 | 0.78548100  | -0.95225100 |
| H        | -2.29775900 | -0.28357900 | -0.05638100 |
| O        | -1.54570800 | -1.81240700 | 0.04614800  |
| H        | -1.71820800 | -2.44010100 | 0.75386000  |
| H        | -0.58208700 | -1.65824700 | 0.03375900  |
| O        | -0.19921700 | 1.92773300  | 0.16559000  |
| H        | -0.27963300 | 2.48874100  | 0.94287100  |

---

|   |             |            |            |
|---|-------------|------------|------------|
| H | -1.07698300 | 1.48814100 | 0.02588200 |
|---|-------------|------------|------------|

---

F(W)<sub>4</sub>

---

| Symbol | Coordinate  |             |             |
|--------|-------------|-------------|-------------|
|        | X           | Y           | Z           |
| C      | -2.61116400 | 0.29458500  | -0.54256000 |
| O      | -1.88841700 | 1.25252300  | -0.37192600 |
| H      | -3.58920700 | 0.37096600  | -1.03638700 |
| O      | -2.35460600 | -0.94524600 | -0.18067900 |
| H      | -1.46707300 | -1.02238700 | 0.27205200  |
| O      | 2.79856300  | 0.97282800  | -0.54513700 |
| H      | 2.04226800  | 1.33089800  | -0.01777500 |
| H      | 3.60924200  | 1.33914400  | -0.18082600 |
| O      | -0.01147600 | -1.26441800 | 1.03741200  |
| H      | 0.74780400  | -1.45688800 | 0.41385600  |
| H      | 0.00147700  | -1.93695500 | 1.72651600  |
| O      | 0.63774300  | 1.51735400  | 0.92390200  |
| H      | -0.16904800 | 1.71495200  | 0.42099200  |
| H      | 0.44605000  | 0.64828300  | 1.31046700  |
| O      | 2.02970600  | -1.56109600 | -0.56087400 |
| H      | 2.44705300  | -0.66354200 | -0.61067000 |
| H      | 1.90630200  | -1.86753600 | -1.46445100 |

---

F(W)<sub>5</sub>

---

| Symbol | Coordination |             |             |
|--------|--------------|-------------|-------------|
|        | X            | Y           | Z           |
| C      | -2.68512000  | -0.83722600 | 0.47489900  |
| O      | -2.11856800  | -0.03571300 | 1.19466900  |
| O      | -2.21248200  | -1.35294300 | -0.63193600 |
| H      | -3.69110100  | -1.21503600 | 0.70325200  |
| H      | -1.28121500  | -1.00486600 | -0.82770800 |
| O      | 0.13458600   | -0.34395400 | -1.06366100 |
| H      | 0.33265400   | 0.11552600  | -0.22136000 |
| H      | 0.92130500   | -0.90845300 | -1.23055700 |
| O      | -0.07380700  | 2.44273700  | -1.37075600 |
| H      | -0.08223400  | 1.53745400  | -1.72150400 |
| H      | -0.62318300  | 2.98561600  | -1.94265400 |
| O      | 0.32421800   | 1.34436300  | 1.14689300  |
| H      | 0.19190400   | 2.07681900  | 0.51998100  |
| H      | -0.56238800  | 1.02229100  | 1.38915600  |
| O      | 2.67447500   | -0.09959000 | 1.40614800  |
| H      | 2.84578300   | -0.41881200 | 2.29671900  |
| H      | 1.90703500   | 0.50159600  | 1.45986000  |
| O      | 2.53659400   | -1.58910300 | -0.89904200 |
| H      | 2.74234500   | -1.14279400 | -0.05218000 |
| H      | 3.28969000   | -1.45236400 | -1.48092600 |

---

| F(W) <sub>6</sub> |             |             |             |
|-------------------|-------------|-------------|-------------|
| Symbol            | Coordinate  |             |             |
|                   | X           | Y           | Z           |
| C                 | -0.59270700 | -2.16554500 | 0.10889800  |
| O                 | -1.71797800 | -1.87900900 | 0.47303000  |
| H                 | -0.18673500 | -3.17826500 | 0.25498100  |
| O                 | 0.25579100  | -1.36647000 | -0.47797500 |
| H                 | -0.07044400 | -0.32621900 | -0.60619700 |
| O                 | 3.76020100  | 0.72154900  | 0.76326400  |
| H                 | 3.57830500  | -0.11679000 | 0.28695200  |
| H                 | 4.08603900  | 0.48232800  | 1.63579200  |
| O                 | -0.26282600 | 0.97894800  | -0.82031700 |
| H                 | -1.17331500 | 1.35571500  | -0.73663000 |
| H                 | 0.38202300  | 1.55635400  | -0.34548800 |
| O                 | -2.74050000 | 1.94652100  | -0.58978300 |
| H                 | -3.26226300 | 1.27934600  | -0.08928100 |
| H                 | -3.22862700 | 2.14180800  | -1.39506400 |
| O                 | -3.86078600 | -0.12369900 | 0.70624600  |
| H                 | -4.12087500 | -0.10445600 | 1.63188800  |
| H                 | -3.14246000 | -0.77936300 | 0.63058000  |
| O                 | 3.03566600  | -1.55057400 | -0.56869200 |
| H                 | 2.06068600  | -1.56884000 | -0.60069300 |
| H                 | 3.34803800  | -1.69774100 | -1.46653500 |
| O                 | 1.64218500  | 2.38758900  | 0.44925300  |
| H                 | 1.95946200  | 3.20543600  | 0.05531500  |
| H                 | 2.43237700  | 1.82511000  | 0.61078500  |

| M(W) <sub>7</sub> |             |             |             |
|-------------------|-------------|-------------|-------------|
| Symbol            | Coordinate  |             |             |
|                   | X           | Y           | Z           |
| C                 | -0.44035200 | 2.22330700  | 0.38653000  |
| O                 | 0.75864100  | 2.14351500  | 0.60028700  |
| H                 | -1.10823400 | 2.77958800  | 1.05272900  |
| O                 | -1.07041500 | 1.70446300  | -0.63648700 |
| H                 | -0.46362000 | 1.09200200  | -1.20271800 |
| O                 | -1.20773300 | -2.09848600 | -1.22869500 |
| H                 | -1.56027100 | -2.85049100 | -1.71355100 |
| H                 | -1.97388700 | -1.55207000 | -0.89573200 |
| O                 | -1.45344300 | 0.12494800  | 1.98220400  |
| H                 | -0.73506700 | -0.52659600 | 1.77388700  |
| H                 | -1.68677300 | -0.00731700 | 2.90584400  |
| O                 | 2.94612400  | -1.56279800 | 0.70912000  |
| H                 | 3.58389200  | -1.58962200 | 1.42798900  |
| H                 | 3.05165800  | -0.70668700 | 0.25343600  |
| O                 | -2.96989900 | -0.42860500 | -0.21454500 |
| H                 | -2.58615600 | -0.25693200 | 0.67393700  |
| H                 | -2.84644800 | 0.41474000  | -0.67020000 |
| O                 | 0.29811500  | 0.07080500  | -2.00519400 |
| H                 | -0.09294500 | -0.81422100 | -1.85920900 |

|   |             |             |             |
|---|-------------|-------------|-------------|
| H | 1.23057800  | 0.05601600  | -1.72721600 |
| O | 0.22216700  | -1.76586400 | 1.18542600  |
| H | 1.19156700  | -1.72959700 | 1.07478800  |
| H | -0.15324400 | -2.12828900 | 0.36654000  |
| O | 2.65991200  | 0.78269300  | -0.70067900 |
| H | 3.30212400  | 1.36861000  | -1.11317500 |
| H | 2.02117700  | 1.34565600  | -0.19802100 |

| F(W) <sub>8</sub> |             |             |             |
|-------------------|-------------|-------------|-------------|
| Symbol            | Coordinate  |             |             |
|                   | X           | Y           | Z           |
| C                 | -3.94169000 | -0.80479000 | 0.61901400  |
| O                 | -2.76563200 | -1.08571400 | 0.74910500  |
| H                 | -4.73973600 | -1.35530000 | 1.13618900  |
| O                 | -4.41822300 | 0.15803700  | -0.12728100 |
| H                 | -3.67135600 | 0.65571700  | -0.60021800 |
| O                 | 1.72187100  | 2.36853400  | 1.28316900  |
| H                 | 1.56674500  | 3.09573600  | 1.89318400  |
| H                 | 0.86943300  | 2.13346400  | 0.85943200  |
| O                 | 2.43710100  | 1.39846900  | -1.34837800 |
| H                 | 2.99037800  | 0.60487300  | -1.24578700 |
| H                 | 2.66243000  | 1.97226300  | -0.60146500 |
| O                 | 1.35314100  | -2.43050600 | -1.29211900 |
| H                 | 1.09861700  | -2.21984300 | -2.19557800 |
| H                 | 2.23169200  | -2.02963700 | -1.13927000 |
| O                 | 3.58654300  | -1.02292500 | -0.47696500 |
| H                 | 4.47502100  | -1.37906000 | -0.38026200 |
| H                 | 3.23870500  | -0.79807800 | 0.43577500  |
| O                 | 2.42312700  | -0.33432000 | 1.74996700  |
| H                 | 1.53730100  | -0.73866400 | 1.69827700  |
| H                 | 2.27814700  | 0.62839000  | 1.77084500  |
| O                 | -0.09648500 | 1.14140200  | -0.33794900 |
| H                 | -0.11289200 | 0.24593100  | 0.07941700  |
| H                 | 0.68814400  | 1.13826300  | -0.92928200 |
| O                 | 0.00101600  | -1.32296000 | 0.79628900  |
| H                 | -0.93886500 | -1.51562400 | 0.94544500  |
| H                 | 0.32405300  | -1.88586100 | 0.06084800  |
| O                 | -2.55664800 | 1.44799600  | -1.36107900 |
| H                 | -1.63443900 | 1.35499900  | -1.01483200 |
| H                 | -2.69973200 | 2.37707000  | -1.56487900 |

| F(W) <sub>10</sub> |            |            |             |
|--------------------|------------|------------|-------------|
| Symbol             | Coordinate |            |             |
|                    | X          | Y          | Z           |
| C                  | 1.52415200 | 2.41290100 | -0.79571800 |
| O                  | 2.67735900 | 2.24298800 | -1.13327900 |
| H                  | 1.08809500 | 3.42170100 | -0.70712200 |
| O                  | 0.69395800 | 1.43717100 | -0.50465800 |

|   |             |             |             |
|---|-------------|-------------|-------------|
| H | -0.26235200 | 1.80445000  | -0.20409900 |
| O | 1.01476000  | -1.30206000 | -1.09382100 |
| H | 0.88082600  | -0.35705600 | -0.88701400 |
| H | 1.01223500  | -1.75778000 | -0.22813300 |
| O | -3.55756000 | 1.10042900  | -1.03979500 |
| H | -3.45073600 | 0.13781600  | -0.90362600 |
| H | -4.42885800 | 1.33848300  | -0.70865800 |
| O | 3.72264600  | -0.35628100 | -0.77773600 |
| H | 3.01641100  | -0.88439500 | -1.18222300 |
| H | 3.49851400  | 0.56727200  | -0.99901300 |
| O | -1.47562100 | 2.33232400  | 0.19285700  |
| H | -1.68001700 | 2.10899800  | 1.13329200  |
| H | -2.23335800 | 1.97862000  | -0.32681000 |
| O | -1.10718700 | -2.17727300 | -2.46452400 |
| H | -1.12747100 | -1.84936400 | -3.36846500 |
| H | -0.25773700 | -1.87838300 | -2.05585500 |
| O | -2.14700500 | 1.31361900  | 2.55533200  |
| H | -1.97582400 | 1.51577100  | 3.47851400  |
| H | -1.92339400 | 0.36295000  | 2.39598200  |
| O | -2.92829200 | -1.57924300 | -0.67215100 |
| H | -3.56594400 | -2.29762500 | -0.60598700 |
| H | -2.29498700 | -1.82110800 | -1.40285800 |
| O | -1.57400900 | -1.17241400 | 1.81146000  |
| H | -0.65547800 | -1.49254700 | 1.77381800  |
| H | -1.98912500 | -1.36015200 | 0.95169200  |
| O | 1.06633800  | -2.15520000 | 1.54999200  |
| H | 1.21921200  | -3.05270800 | 1.86266700  |
| H | 1.88570300  | -1.62532800 | 1.76619700  |
| O | 3.26690500  | -0.78244300 | 1.80414100  |
| H | 3.34107800  | 0.03698300  | 2.30191600  |
| H | 3.53995000  | -0.58692900 | 0.86755800  |

| M(W) <sub>12</sub> |               |             |             |
|--------------------|---------------|-------------|-------------|
| Symbol             | Cooperativity |             |             |
|                    | X             | Y           | Z           |
| C                  | 2.97624500    | 0.14434800  | 1.16681800  |
| O                  | 2.96370000    | 0.77592600  | 0.12349300  |
| H                  | 3.83058000    | -0.46436600 | 1.47977500  |
| O                  | 2.00032900    | 0.11411700  | 2.04095000  |
| H                  | 1.20484000    | 0.63359200  | 1.71875300  |
| O                  | 1.07201000    | 2.39275000  | -1.28869200 |
| H                  | 1.79067500    | 2.07152400  | -0.71942100 |
| H                  | 0.68781100    | 1.56844900  | -1.65199500 |
| O                  | 2.85498300    | -0.97139800 | -2.15234000 |
| H                  | 3.23372500    | -0.19035800 | -1.72295700 |
| H                  | 1.93339100    | -0.71960700 | -2.35069800 |
| O                  | -0.26599700   | 1.30773500  | 1.51075500  |
| H                  | -0.78859400   | 0.95872900  | 0.75619200  |

---

|   |             |             |             |
|---|-------------|-------------|-------------|
| H | -0.35396600 | 2.27269100  | 1.40014400  |
| O | -1.11858700 | -0.80872700 | 2.96754700  |
| H | -0.82574200 | -1.09685400 | 3.83781300  |
| H | -0.82805900 | 0.11286100  | 2.84114400  |
| O | -2.53602900 | -2.28887000 | -0.78201000 |
| H | -3.02362500 | -1.88948600 | -0.02885800 |
| H | -1.61959700 | -2.33917200 | -0.45756800 |
| O | -0.82571400 | 3.56495500  | 0.05219600  |
| H | -0.88114000 | 4.52314800  | -0.00316000 |
| H | -0.06566100 | 3.25631700  | -0.52008100 |
| O | -2.26188800 | 1.20255800  | -0.35590700 |
| H | -2.41040900 | 0.82974300  | -1.24598500 |
| H | -2.11471000 | 2.16042500  | -0.43431200 |
| O | -2.46034400 | -0.44182800 | -2.57599600 |
| H | -3.03556000 | -0.54249100 | -3.33979700 |
| H | -2.58005900 | -1.23863600 | -1.96978900 |
| O | 2.50601500  | -2.40310600 | 0.05918900  |
| H | 2.69912300  | -1.99268000 | -0.82398800 |
| H | 2.75617100  | -3.33054300 | 0.00747500  |
| O | -0.06926700 | -1.59959400 | 0.42747100  |
| H | -0.33282700 | -1.46042900 | 1.35405800  |
| H | 0.83646800  | -1.98137500 | 0.42637900  |
| O | -3.47099400 | -0.75391700 | 1.29456100  |
| H | -3.22829200 | 0.09265500  | 0.88231500  |
| H | -2.87566100 | -0.86184400 | 2.05138600  |
| O | 0.20328000  | -0.14624900 | -1.94383100 |
| H | 0.03251500  | -0.54648600 | -1.06696000 |
| H | -0.63084700 | -0.24671700 | -2.43985400 |

---



---

$F(W)_{14}$

---

| Symbol | Coordinate  |             |             |
|--------|-------------|-------------|-------------|
|        | X           | Y           | Z           |
| C      | 3.85250000  | -0.09269500 | -1.47827600 |
| O      | 3.50793300  | 0.34079200  | -2.55641800 |
| H      | 4.62027200  | -0.87273000 | -1.37027000 |
| O      | 3.33108200  | 0.33289900  | -0.34337600 |
| H      | 3.63811600  | -0.21507400 | 0.47035200  |
| O      | 0.71174300  | 0.33374000  | -2.23222500 |
| H      | 1.61252200  | 0.59416500  | -2.49008600 |
| H      | 0.15743200  | 1.12757200  | -2.15676800 |
| O      | 1.70653000  | 2.18776000  | 1.04000100  |
| H      | 1.52996800  | 1.37352300  | 1.56288500  |
| H      | 2.24885300  | 1.87247900  | 0.29991900  |
| O      | -0.45291700 | 3.44652900  | 0.55555000  |
| H      | 0.43318400  | 2.98385000  | 0.73681900  |
| H      | -0.35288500 | 4.37151000  | 0.80226300  |
| O      | -4.12958200 | -2.97778500 | -0.47234800 |
| H      | -3.87669200 | -3.72856500 | -1.01761700 |

---



---

|   |             |             |             |
|---|-------------|-------------|-------------|
| H | -3.31143700 | -2.64190000 | -0.04837600 |
| O | -3.00479900 | 0.65992600  | -0.63282000 |
| H | -3.83283100 | 0.32904500  | -1.04780700 |
| H | -2.49911900 | 1.19162000  | -1.27277400 |
| O | -1.95144200 | -1.60759200 | 0.47623700  |
| H | -2.24646300 | -0.76637900 | 0.05731100  |
| H | -1.84060200 | -1.39919500 | 1.42364900  |
| O | -1.17457600 | 2.42037000  | -1.82751600 |
| H | -1.34617600 | 3.05276600  | -2.53243700 |
| H | -0.93666000 | 2.93096000  | -1.01765500 |
| O | 0.72760900  | -1.44707000 | -0.27286300 |
| H | 0.73278800  | -0.76685200 | -0.99965600 |
| H | -0.20512700 | -1.70878100 | -0.14746500 |
| O | 1.25159600  | -0.28121000 | 2.12012100  |
| H | 0.42804100  | -0.35377800 | 2.63672900  |
| H | 1.05407000  | -0.70924600 | 1.25136400  |
| O | -1.41841800 | -0.39316000 | 2.96365000  |
| H | -1.76715200 | 0.48186300  | 2.62344900  |
| H | -1.81979500 | -0.55242900 | 3.82345300  |
| O | -5.16409500 | -0.68612800 | -1.52033700 |
| H | -6.05665700 | -0.52263400 | -1.20226100 |
| H | -4.90580800 | -1.58059300 | -1.20673500 |
| O | 3.85430500  | -1.09365100 | 1.68217700  |
| H | 3.69947900  | -1.97017200 | 1.28112400  |
| H | 3.06204000  | -0.89945000 | 2.21739300  |
| O | -2.34050000 | 1.76416600  | 1.82227500  |
| H | -1.69357700 | 2.43134800  | 1.52874300  |
| H | -2.77763400 | 1.45875900  | 1.00423200  |
| O | 3.04022400  | -2.84084400 | -0.23055400 |
| H | 3.05084600  | -3.73740700 | -0.57632800 |
| H | 2.12847500  | -2.48804800 | -0.33622500 |

---

$F(W)_{16}$

---

| Symbol | Coordinate  |             |             |
|--------|-------------|-------------|-------------|
|        | X           | Y           | Z           |
| C      | -1.40748400 | -2.65330800 | -1.88526400 |
| O      | -2.27668800 | -1.83426300 | -2.11856500 |
| H      | -1.60203800 | -3.72925100 | -1.87809500 |
| O      | -0.14353900 | -2.36961700 | -1.65449900 |
| H      | 0.01697700  | -1.37210700 | -1.52953300 |
| O      | -1.33431500 | 0.52262600  | 3.20362300  |
| H      | -1.22246800 | 0.70611500  | 4.14156100  |
| H      | -1.56576900 | 1.39963700  | 2.73146300  |
| O      | -0.63887500 | 2.22825300  | -1.99652900 |
| H      | -1.48074800 | 1.88482700  | -2.34943700 |
| H      | -0.84977400 | 2.89415500  | -1.31868600 |
| O      | 3.43772200  | 0.07222000  | 1.79395700  |
| H      | 3.71830800  | -0.81862300 | 1.52046900  |
| H      | 2.46303200  | 0.01613400  | 1.86652100  |

---

---

|   |             |             |             |
|---|-------------|-------------|-------------|
| O | 1.89043700  | 3.21484300  | -1.02208500 |
| H | 1.49972800  | 2.75062000  | -1.77466600 |
| H | 2.64339000  | 2.68175000  | -0.69469500 |
| O | 1.06678100  | -2.96407500 | 0.89100100  |
| H | 0.67403500  | -2.99714900 | 0.00254400  |
| H | 2.03456900  | -2.96201800 | 0.76277900  |
| O | -2.90836000 | 0.75062800  | -2.53336100 |
| H | -2.61327700 | -0.18333500 | -2.44279800 |
| H | -3.57605000 | 0.76657000  | -3.22638400 |
| O | 4.02466400  | 1.70407900  | -0.13498200 |
| H | 3.83851400  | 1.13922000  | 0.67533500  |
| H | 4.83588000  | 2.19617400  | 0.02476200  |
| O | -3.11528000 | -1.11991800 | 1.96549200  |
| H | -3.90408300 | -1.34117000 | 2.47120800  |
| H | -2.53012000 | -0.59362200 | 2.55447100  |
| O | -0.32215700 | 3.98082700  | 0.17410200  |
| H | -0.39924600 | 4.93997300  | 0.17605100  |
| H | 0.60291200  | 3.75934400  | -0.10850100 |
| O | -1.73526000 | -3.29760300 | 0.70676200  |
| H | -2.24213500 | -2.58944700 | 1.13724500  |
| H | -0.98496400 | -3.48617400 | 1.28392300  |
| O | 0.71634200  | -0.38413900 | 1.60666600  |
| H | 0.02612900  | -0.11524000 | 2.24659400  |
| H | 0.71506700  | -1.36447000 | 1.51347400  |
| O | 0.54476200  | 0.01924200  | -1.05860000 |
| H | 0.09610900  | 0.84123600  | -1.37885700 |
| H | 0.52978400  | 0.02676500  | -0.07131200 |
| O | 3.25042700  | -0.58868500 | -1.55310800 |
| H | 2.30194000  | -0.36213700 | -1.50990500 |
| H | 3.71319400  | 0.22655700  | -1.29190600 |
| O | -3.58903600 | 1.08886700  | 0.22446300  |
| H | -3.49526800 | 0.20120300  | 0.60959800  |
| H | -3.45557400 | 1.00633100  | -0.73379500 |
| O | 3.73059900  | -2.34671900 | 0.33885100  |
| H | 4.44953500  | -2.95455500 | 0.14088000  |
| H | 3.59631400  | -1.75859100 | -0.45767600 |
| O | -2.02352800 | 2.55866500  | 1.87115300  |
| H | -2.63508600 | 2.16592200  | 1.20649800  |
| H | -1.35149700 | 3.06335000  | 1.37772400  |

---

$F(W)_{18}$

---

| Symbol | Coordinate |             |             |
|--------|------------|-------------|-------------|
|        | X          | Y           | Z           |
| C      | 2.39713100 | -1.48569600 | 1.11752800  |
| O      | 2.28429000 | -1.95602000 | 2.24012400  |
| H      | 2.46694900 | -0.39550700 | 0.95339700  |
| O      | 2.43762600 | -2.22584500 | 0.04082800  |
| H      | 2.42702800 | -1.61834000 | -0.80230900 |

---

---

|   |             |             |             |
|---|-------------|-------------|-------------|
| O | -1.67767700 | 0.76159500  | -2.22883100 |
| H | -2.55830400 | 0.40096300  | -2.00162700 |
| H | -1.74530000 | 1.73392000  | -2.18222800 |
| O | 0.25639400  | -0.94254400 | -3.46867100 |
| H | -0.45334800 | -0.30996100 | -3.26467900 |
| H | -0.13450600 | -1.83768400 | -3.35803400 |
| O | 4.11894400  | 1.12806000  | -2.28064200 |
| H | 4.46451500  | 1.47736100  | -3.10624100 |
| H | 3.89166100  | 1.89092500  | -1.69047300 |
| O | -1.85842700 | 3.44665100  | -1.36733400 |
| H | -2.20464100 | 4.20748900  | -1.84429200 |
| H | -2.57328100 | 3.13823800  | -0.74769600 |
| O | -0.41859500 | 0.03915500  | 2.24873100  |
| H | -0.07670900 | 0.26465100  | 1.34789000  |
| H | 0.30294800  | 0.16864200  | 2.89262900  |
| O | 0.20486300  | 0.49608300  | -0.31248300 |
| H | -0.54375500 | 0.45647700  | -0.95251100 |
| H | 0.99229100  | 0.17188800  | -0.80199500 |
| O | -3.71569300 | 2.33429200  | 0.13714900  |
| H | -3.43505800 | 1.98798500  | 1.00286300  |
| H | -4.06077900 | 1.56909900  | -0.35649800 |
| O | -0.81344600 | -3.35850300 | -2.85598300 |
| H | -0.75560800 | -4.16394300 | -3.37713400 |
| H | -0.51742900 | -3.58092900 | -1.94206900 |
| O | 0.63071000  | 3.17983100  | 0.02261400  |
| H | 0.46453000  | 2.22909800  | -0.15298200 |
| H | -0.14130500 | 3.62234600  | -0.36484800 |
| O | 3.38610600  | 2.97637100  | -0.51805500 |
| H | 3.43309900  | 2.55166900  | 0.35368900  |
| H | 2.45766200  | 3.26929300  | -0.56475000 |
| O | -2.91927300 | 0.99621200  | 2.50686000  |
| H | -3.13743500 | 1.33988300  | 3.37872300  |
| H | -1.96240800 | 0.75419000  | 2.50729700  |
| O | 0.05091400  | -3.82350600 | -0.34652700 |
| H | -0.46306000 | -3.36603300 | 0.34189900  |
| H | 0.96885200  | -3.55311300 | -0.19576600 |
| O | -1.25400400 | -2.51720500 | 1.80758200  |
| H | -0.83923100 | -1.65388200 | 2.03516300  |
| H | -1.09057700 | -3.11026400 | 2.54898700  |
| O | 1.83084800  | 0.05093400  | 3.91872700  |
| H | 2.12609500  | -0.76582300 | 3.44254000  |
| H | 1.97251700  | -0.08062500 | 4.86070000  |
| O | -3.71350700 | -1.31739100 | 1.08075400  |
| H | -2.96356400 | -1.91377200 | 1.25230200  |
| H | -3.61960300 | -0.59125200 | 1.72112900  |
| O | 2.20164900  | -0.60209500 | -1.81972300 |
| H | 1.52734700  | -0.76428700 | -2.55377000 |
| H | 2.93728100  | -0.00834500 | -2.12413900 |
| O | -4.10429700 | -0.11372500 | -1.21356800 |
| H | -3.95415400 | -0.68344700 | -0.40876300 |

---

|   |             |             |             |
|---|-------------|-------------|-------------|
| H | -4.82649000 | -0.50417300 | -1.71527700 |
| O | 2.24940800  | 1.77384200  | 1.76264500  |
| H | 2.25757700  | 1.51796700  | 2.69713200  |
| H | 1.56875100  | 2.45393700  | 1.63299200  |

| F(W) <sub>20</sub> |              |             |             |
|--------------------|--------------|-------------|-------------|
| Symbol             | Coordination |             |             |
| C                  | -0.72882500  | 0.41089800  | -2.23933200 |
| O                  | -1.43925200  | -0.11992300 | -3.06946100 |
| H                  | -0.12249300  | 1.30153400  | -2.46471600 |
| O                  | -0.63490500  | -0.03026200 | -0.99917600 |
| H                  | -0.17335400  | 0.66731900  | -0.37787400 |
| O                  | 0.10044100   | -2.85315800 | -1.17053700 |
| H                  | 0.00654800   | -2.40851600 | -0.29428700 |
| H                  | 0.62582900   | -3.64137600 | -0.96163900 |
| O                  | -2.93331900  | 2.34353100  | -1.92644300 |
| H                  | -2.93788000  | 2.12728000  | -2.86501400 |
| H                  | -3.23012900  | 1.54126700  | -1.45645000 |
| O                  | -2.07694800  | 0.60147000  | 3.49692600  |
| H                  | -2.49102600  | 0.79583000  | 4.34381400  |
| H                  | -2.23262800  | 1.37345500  | 2.90929100  |
| O                  | 3.33886700   | -0.05495700 | 2.19404100  |
| H                  | 3.21592800   | -0.61579000 | 1.40251100  |
| H                  | 2.47720700   | -0.01952700 | 2.64235000  |
| O                  | -2.52917500  | -2.00595500 | 2.31319000  |
| H                  | -3.23221800  | -2.11927300 | 1.65073400  |
| H                  | -2.57433300  | -1.09963200 | 2.66054000  |
| O                  | -3.26026800  | 0.24177600  | -0.16259900 |
| H                  | -3.93084000  | -0.45148900 | -0.02367300 |
| H                  | -2.42737200  | -0.22861800 | -0.35022700 |
| O                  | -2.31255200  | 2.29825500  | 1.40462200  |
| H                  | -2.67117600  | 3.15459200  | 1.08941400  |
| H                  | -2.77210000  | 1.61026200  | 0.87989900  |
| O                  | 4.40860600   | 2.15029100  | 1.30225800  |
| H                  | 4.99929200   | 2.59534800  | 1.91699200  |
| H                  | 4.01049400   | 1.36117300  | 1.76689400  |
| O                  | -3.27142400  | 4.37162800  | -0.09425600 |
| H                  | -2.85580900  | 5.22387700  | -0.25377700 |
| H                  | -3.19193700  | 3.84987600  | -0.91614100 |
| O                  | 5.04201300   | 0.45507900  | -0.90274900 |
| H                  | 4.75985400   | -0.39605700 | -0.53427100 |
| H                  | 5.06105700   | 1.07943600  | -0.15727200 |
| O                  | 0.60329700   | 0.08559300  | 2.70671400  |
| H                  | 0.51019600   | 0.73830400  | 1.97649600  |
| H                  | -0.18127900  | 0.21328000  | 3.26700400  |
| O                  | 3.21084700   | -1.62734400 | -0.10875800 |
| H                  | 2.74187700   | -1.40577700 | -0.93324500 |
| H                  | 2.94192700   | -2.53530300 | 0.12099300  |

|   |             |             |             |
|---|-------------|-------------|-------------|
| O | 0.01341700  | -2.28269300 | 1.47442400  |
| H | -0.92450900 | -2.33401800 | 1.77847000  |
| H | 0.34774800  | -1.45869600 | 1.89092000  |
| O | 2.88667200  | 1.43468700  | -2.32385500 |
| H | 2.33068400  | 0.64814300  | -2.43275900 |
| H | 3.73766000  | 1.08972100  | -1.97697500 |
| O | 2.22683900  | 2.99421100  | -0.22672600 |
| H | 3.00282800  | 2.88703400  | 0.35679400  |
| H | 2.46205700  | 2.53175500  | -1.06828000 |
| O | 1.70807100  | -1.15918400 | -2.51347300 |
| H | 1.00761300  | -1.75168800 | -2.14999900 |
| H | 1.98898700  | -1.53369400 | -3.35535800 |
| O | 0.24482300  | 1.69312700  | 0.56096200  |
| H | 1.03895400  | 2.29575500  | 0.27834300  |
| H | -0.55743500 | 2.20192700  | 0.79607600  |
| O | 1.89177200  | -4.01438700 | 0.67913900  |
| H | 1.22958800  | -3.54691000 | 1.23562200  |
| H | 2.24777800  | -4.74915000 | 1.18749500  |
| O | -2.56710300 | -2.46543500 | -1.88947800 |
| H | -2.37862500 | -1.66681700 | -2.41515700 |
| H | -1.68412600 | -2.81484700 | -1.66952100 |
| O | -4.28049200 | -2.27007100 | 0.08481400  |
| H | -3.68952900 | -2.45920200 | -0.69577200 |
| H | -5.07419200 | -2.80639900 | 0.00113000  |

FA

| Symbol | Coordinate  |             |             |
|--------|-------------|-------------|-------------|
|        | X           | Y           | Z           |
| N      | 1.93594400  | 0.08804000  | -0.00004700 |
| H      | 2.52978700  | 0.02355400  | 0.82065400  |
| H      | 2.52904800  | 0.02507300  | -0.82141900 |
| H      | 1.48266500  | 1.00110200  | 0.00090900  |
| C      | -1.25161600 | -0.06017200 | -0.00007500 |
| O      | -0.88613900 | 1.09647100  | 0.00007800  |
| O      | -0.46062700 | -1.11607500 | 0.00005800  |
| H      | -2.31242400 | -0.35008200 | -0.00037200 |
| H      | 0.50313800  | -0.79807000 | -0.00007700 |

E(A)(W)<sub>1</sub>

| Symbol | Coordination |             |             |
|--------|--------------|-------------|-------------|
|        | X            | Y           | Z           |
| C      | 1.66852200   | -0.51586700 | -0.01201500 |
| O      | 0.73644200   | -1.29572200 | -0.00345300 |
| O      | 1.58449300   | 0.79257100  | 0.00648200  |
| H      | 2.71495800   | -0.85257800 | -0.03761300 |
| H      | 0.61802600   | 1.10031000  | 0.02882400  |
| O      | -0.87741000  | 1.57170500  | 0.07545100  |
| H      | -1.49855800  | 0.78578900  | 0.00554500  |
| H      | -1.17693300  | 2.25548300  | -0.53076700 |
| N      | -2.20453100  | -0.76732300 | -0.00710500 |

|   |             |             |             |
|---|-------------|-------------|-------------|
| H | -2.74225100 | -1.08341300 | -0.80759000 |
| H | -1.31868200 | -1.27582500 | 0.00571200  |
| H | -2.72418200 | -1.01173000 | 0.82987200  |

F(A)(W)<sub>2</sub>

| Symbol | Coordinate  |             |             |
|--------|-------------|-------------|-------------|
|        | X           | Y           | Z           |
| C      | -2.07130700 | 0.61724200  | -0.14376500 |
| O      | -2.42394800 | -0.41683700 | -0.66426800 |
| O      | -1.01141900 | 0.75229200  | 0.63821400  |
| H      | -2.60838300 | 1.56837800  | -0.27342600 |
| H      | -0.57074800 | -0.17203400 | 0.71848500  |
| O      | 2.38523400  | -1.01015500 | -0.42961100 |
| H      | 2.34099600  | -0.02729000 | -0.29509000 |
| H      | 3.22807100  | -1.32137800 | -0.08778500 |
| N      | 1.87537800  | 1.68407000  | -0.05429700 |
| H      | 1.96793500  | 2.21843600  | -0.91306900 |
| H      | 2.36854900  | 2.19332700  | 0.67275100  |
| H      | 0.88668800  | 1.67412100  | 0.19609600  |
| O      | -0.01992500 | -1.58723200 | 0.59162500  |
| H      | 0.88053200  | -1.56445600 | 0.19049900  |
| H      | -0.63298300 | -1.96558800 | -0.05347500 |

F(A)(W)<sub>3</sub>

| Symbol | Coordinate  |             |             |
|--------|-------------|-------------|-------------|
|        | X           | Y           | Z           |
| C      | -0.25682100 | -0.96547000 | 0.94204100  |
| O      | -1.37681000 | -0.75175300 | 1.34971300  |
| O      | -0.00601100 | -1.40566500 | -0.27865300 |
| H      | 0.64128500  | -0.80019800 | 1.55960700  |
| H      | 0.98654500  | -1.39370500 | -0.43888700 |
| O      | -2.42510900 | -0.12038500 | -1.26866700 |
| H      | -1.74316700 | -0.69958100 | -1.63042300 |
| H      | -2.53243500 | -0.45607300 | -0.36510800 |
| N      | -0.79307700 | 2.02116200  | 0.10394100  |
| H      | -1.31349700 | 1.43768000  | -0.55926900 |
| H      | -1.18283400 | 1.80602900  | 1.01923900  |
| H      | -1.02092800 | 2.98955400  | -0.10312900 |
| O      | 1.85865200  | 1.51297600  | 0.01384500  |
| H      | 0.87173000  | 1.72865500  | 0.03295100  |
| H      | 2.30359000  | 2.11333300  | 0.61870400  |
| O      | 2.51999900  | -0.97784100 | -0.44042500 |
| H      | 2.43116800  | 0.00397500  | -0.31948500 |
| H      | 3.08523700  | -1.14365100 | -1.20053200 |

F(A)(W)<sub>4</sub>

| Symbol | Coordinate |   |   |
|--------|------------|---|---|
|        | X          | Y | Z |

---

|   |             |             |             |
|---|-------------|-------------|-------------|
| C | -0.75450200 | -1.01993900 | -1.00839800 |
| O | -1.89234200 | -0.71179200 | -1.28518700 |
| O | -0.44159800 | -1.76052600 | 0.03699700  |
| H | 0.11036500  | -0.68834400 | -1.60884600 |
| H | 0.55732000  | -1.86992200 | 0.09710600  |
| O | 2.97037800  | 0.60878000  | 0.50377500  |
| H | 3.19013300  | 0.89951200  | 1.39377900  |
| H | 2.30050500  | 1.24528900  | 0.14690400  |
| N | -2.33460200 | -0.06290800 | 1.62588900  |
| H | -1.58172700 | -0.65427600 | 1.96598300  |
| H | -2.79631000 | -0.59910600 | 0.89266300  |
| H | -2.99225500 | 0.08660400  | 2.38380200  |
| O | 2.12058500  | -1.84223800 | 0.17266700  |
| H | 2.70625800  | -2.34857500 | -0.39694000 |
| H | 2.51116600  | -0.93524700 | 0.30501000  |
| O | 1.10437500  | 2.20326600  | -0.48518700 |
| H | 1.26193800  | 3.08759300  | -0.82640100 |
| H | 0.12903300  | 2.12348600  | -0.29390600 |
| O | -1.47604200 | 1.92562500  | -0.08907700 |
| H | -1.75187600 | 1.32066900  | 0.65070300  |
| H | -1.85817500 | 1.50739900  | -0.87259500 |

---

$F(A)(W)_5$

---

| Symbol | Coordinate  |             |             |
|--------|-------------|-------------|-------------|
|        | X           | Y           | Z           |
| C      | 1.64067600  | -1.83242700 | 1.03115500  |
| O      | 1.49165400  | -0.87881800 | 1.77777500  |
| O      | 1.75383300  | -1.78201000 | -0.26864100 |
| H      | 1.68419300  | -2.86169900 | 1.41785700  |
| O      | -3.43655000 | -0.73388300 | -0.92633500 |
| H      | -3.97897200 | -0.38631300 | -1.64023400 |
| H      | -2.52467900 | -0.83034300 | -1.27691900 |
| O      | -0.26814800 | 0.94321700  | 0.65826300  |
| H      | -1.16495700 | 0.91944900  | 1.06056800  |
| H      | 0.33460700  | 0.42035600  | 1.22218100  |
| O      | -0.77015100 | -0.70941600 | -1.49458600 |
| H      | -0.54792000 | -0.09840100 | -0.75644000 |
| H      | -0.23616100 | -1.50019200 | -1.34275200 |
| O      | 1.36741500  | 2.98144100  | -0.13842200 |
| H      | 0.63534000  | 2.46932200  | 0.25618000  |
| H      | 1.64396100  | 3.63226000  | 0.51226600  |
| O      | -2.88472000 | 0.68610100  | 1.33245900  |
| H      | -3.25479400 | 0.28636200  | 2.12447500  |
| H      | -3.22740300 | 0.18047400  | 0.56342000  |
| N      | 2.07984900  | 0.45886300  | -1.45189500 |
| H      | 2.08801600  | 1.32952400  | -0.91031000 |
| H      | 1.29289100  | 0.52565500  | -2.09676500 |
| H      | 2.93057900  | 0.43165100  | -2.00767400 |
| H      | 1.89562600  | -0.78863400 | -0.67361600 |

---

---

F(A)(W)<sub>6</sub>

---

| Symbol | Coordinate  |             |             |
|--------|-------------|-------------|-------------|
|        | X           | Y           | Z           |
| C      | -3.11783400 | -0.08551600 | 0.69313800  |
| O      | -2.33216200 | 0.85193600  | 0.80031500  |
| H      | -4.01536900 | -0.14554000 | 1.32552200  |
| O      | -3.01609100 | -1.08108300 | -0.12727600 |
| H      | -2.16243800 | -1.00932600 | -0.74571800 |
| O      | 1.77141800  | -1.39044600 | 1.66651800  |
| H      | 1.79862500  | -1.81956700 | 2.52644500  |
| H      | 1.19273400  | -0.57914000 | 1.75542200  |
| O      | 0.36285500  | 0.80409900  | 1.74942100  |
| H      | 0.80828900  | 1.47003200  | 1.19256500  |
| H      | -0.57156200 | 0.79293300  | 1.48161900  |
| O      | -1.04061400 | -0.88517600 | -1.62206600 |
| H      | -0.23571500 | -1.37518200 | -1.36314700 |
| H      | -0.80852700 | 0.07257900  | -1.69248800 |
| O      | 1.73555500  | 2.25360100  | -0.18408200 |
| H      | 2.36493800  | 1.48680200  | -0.38140800 |
| H      | 2.24671200  | 3.06663800  | -0.13296700 |
| O      | -0.72443800 | 1.77094700  | -1.43878500 |
| H      | -1.33467700 | 1.80772500  | -0.68613600 |
| H      | 0.13840300  | 2.08472600  | -1.11423800 |
| O      | 1.24658000  | -2.25157500 | -0.83102200 |
| H      | 1.39814900  | -2.13538900 | 0.13375800  |
| H      | 1.24558700  | -3.19496700 | -1.01868300 |
| N      | 3.21386800  | 0.04365500  | -0.55043200 |
| H      | 2.71333400  | -0.60551000 | -1.15692600 |
| H      | 4.16501500  | 0.12112600  | -0.89704100 |
| H      | 3.24160500  | -0.40885900 | 0.36343500  |

---

F(A)(W)<sub>7</sub>

---

| Symbol | Coordinate  |             |             |
|--------|-------------|-------------|-------------|
|        | X           | Y           | Z           |
| C      | 0.86073400  | 0.72790300  | -1.21129300 |
| O      | -0.17861100 | 0.69916700  | -1.85406500 |
| O      | 1.32950900  | 1.82902700  | -0.68128400 |
| H      | 1.46416400  | -0.17932000 | -1.04369200 |
| H      | 2.17618000  | 1.61912400  | -0.14400100 |
| O      | -0.23456900 | -0.44885200 | 1.30448300  |
| H      | -0.55418800 | -1.00460700 | 0.57170300  |
| H      | -0.98693600 | 0.10477100  | 1.57242100  |
| O      | 2.39456200  | -1.14064400 | 1.53569400  |
| H      | 2.26990600  | -1.79114900 | 0.82000800  |
| H      | 1.47958100  | -0.88345700 | 1.76547100  |

---



|   |             |             |             |
|---|-------------|-------------|-------------|
| O | -2.57944800 | 1.13206200  | 1.41969400  |
| H | -2.22842800 | 1.79614500  | 0.77456600  |
| H | -3.01056700 | 1.62440800  | 2.12466900  |
| O | 1.54144100  | -2.59362300 | -0.70463700 |
| H | 1.82991600  | -3.42379400 | -1.09410300 |
| H | 0.57149000  | -2.53561800 | -0.83182000 |
| O | 3.30988800  | 1.10247800  | 0.68993400  |
| H | 3.06732300  | 0.19337100  | 1.05846400  |
| H | 4.22798500  | 1.09948400  | 0.40562100  |
| O | -1.43495700 | 2.74180700  | -0.39297400 |
| H | -0.54833300 | 3.00071700  | -0.10688200 |
| H | -1.24575100 | 2.15178800  | -1.14483500 |
| O | -1.04756000 | -1.84662400 | -1.05138500 |
| H | -1.98059300 | -1.84541500 | -0.70584300 |
| H | -0.94913400 | -1.06239500 | -1.61848500 |
| N | -3.46798100 | -1.52875300 | 0.21039000  |
| H | -3.36825800 | -0.59560700 | 0.61619600  |
| H | -3.57545700 | -2.18498100 | 0.97830200  |
| H | -4.32948300 | -1.54800100 | -0.32642100 |

---

F(A)(W)<sub>9</sub>

---

| Symbol | Coordinate  |             |             |
|--------|-------------|-------------|-------------|
|        | X           | Y           | Z           |
| C      | 1.86718900  | -1.72354300 | 0.36191400  |
| O      | 0.84201400  | -2.26275100 | 0.71994400  |
| H      | 2.58909800  | -1.30103700 | 1.07987000  |
| O      | 2.20660600  | -1.58792900 | -0.90642300 |
| H      | 3.08761500  | -1.10311200 | -0.96989600 |
| N      | -0.97553500 | -0.01910900 | 1.89743800  |
| H      | -1.88925100 | 0.27486700  | 1.54691300  |
| H      | -1.00050900 | 0.03483800  | 2.91109800  |
| H      | -0.84126900 | -0.99676600 | 1.64524200  |
| O      | -0.31010600 | 3.54864600  | -0.10747300 |
| H      | -1.02866300 | 3.09295600  | -0.61383400 |
| H      | -0.00706800 | 4.28637700  | -0.64382800 |
| O      | -4.08906700 | -1.82516800 | 0.21381800  |
| H      | -3.17560300 | -2.05538200 | -0.08768500 |
| H      | -4.69822200 | -2.23222800 | -0.40887200 |
| O      | -3.65155000 | 0.77198400  | 0.56331200  |
| H      | -4.36256000 | 1.26500800  | 0.98314500  |
| H      | -3.97136900 | -0.15309800 | 0.42243300  |
| O      | 3.44127200  | 1.04169200  | 1.27788000  |
| H      | 2.47649300  | 1.18960700  | 1.05558200  |
| H      | 3.74696600  | 1.80280100  | 1.77913700  |
| O      | 0.94223100  | 1.23598800  | 0.54825200  |
| H      | 0.62871400  | 2.15069200  | 0.35820500  |
| H      | 0.23699800  | 0.81539900  | 1.15186700  |
| O      | -0.11313400 | 0.00058900  | -1.66191000 |
| H      | 0.55962800  | -0.54240000 | -2.09280600 |

---

|   |             |             |             |
|---|-------------|-------------|-------------|
| H | 0.35387900  | 0.42856300  | -0.90722100 |
| O | 4.37985000  | -0.20918000 | -0.83538900 |
| H | 5.25260300  | -0.60248400 | -0.74287200 |
| H | 4.21148000  | 0.37237300  | -0.05106300 |
| O | -2.07331400 | 2.01823200  | -1.39801200 |
| H | -2.69176500 | 1.58445000  | -0.78060700 |
| H | -1.53119000 | 1.31351600  | -1.78740700 |
| O | -1.60572900 | -2.14023800 | -0.66638800 |
| H | -1.22506800 | -1.32880100 | -1.05492300 |
| H | -0.84788900 | -2.55604500 | -0.22692300 |

| F(A)(W) <sub>11</sub> |             |             |             |
|-----------------------|-------------|-------------|-------------|
| Symbol                | Coordinate  |             |             |
|                       | X           | Y           | Z           |
| C                     | 4.34506100  | 0.88341700  | -0.86236000 |
| O                     | 3.15202400  | 0.74434500  | -1.10466800 |
| H                     | 4.94839900  | 1.65623000  | -1.35778800 |
| O                     | 5.02995600  | 0.16790000  | -0.02335600 |
| H                     | 4.39962700  | -0.50067900 | 0.45477100  |
| N                     | 1.05524300  | -0.05126900 | 1.51998400  |
| H                     | 0.42286100  | -0.67516900 | 2.01589300  |
| H                     | 0.67368600  | 0.07347700  | 0.58271400  |
| H                     | 1.02252700  | 0.86560500  | 1.96355600  |
| O                     | -0.85802200 | -0.03029100 | -1.59170300 |
| H                     | -1.68482600 | 0.08715700  | -2.10206200 |
| H                     | -1.16757100 | -0.45650500 | -0.76476100 |
| O                     | -4.30627100 | 1.17572900  | 0.26326500  |
| H                     | -4.96174100 | 1.82393000  | 0.53759800  |
| H                     | -3.49416800 | 1.29928400  | 0.84439100  |
| O                     | 0.70219500  | 2.15679100  | -0.99917400 |
| H                     | 0.09076000  | 1.46450100  | -1.32434300 |
| H                     | 1.60135500  | 1.82964200  | -1.16354400 |
| O                     | -1.67606800 | -1.34922200 | 0.71908100  |
| H                     | -1.03844200 | -2.09091200 | 0.80992200  |
| H                     | -2.56840100 | -1.69337300 | 0.53126100  |
| O                     | 0.03832900  | 2.77741900  | 1.46626000  |
| H                     | 0.03221300  | 3.72210100  | 1.64516900  |
| H                     | 0.32223300  | 2.65049100  | 0.52098700  |
| O                     | -4.36013300 | -1.52482200 | -0.00164900 |
| H                     | -5.07675300 | -2.07069100 | 0.33534500  |
| H                     | -4.55347900 | -0.59268000 | 0.23943100  |
| O                     | -3.51988500 | 0.11341800  | -2.26747100 |
| H                     | -3.86536600 | -0.73818800 | -1.96468700 |
| H                     | -3.82087800 | 0.73834000  | -1.58653300 |
| O                     | -2.20389400 | 1.18624000  | 1.76894400  |
| H                     | -1.85691600 | 0.29239800  | 1.59810800  |
| H                     | -1.45382800 | 1.81089000  | 1.68437600  |
| O                     | 3.32371000  | -1.30795400 | 1.04177500  |
| H                     | 3.38091700  | -2.12809400 | 1.53928900  |

|   |            |             |             |
|---|------------|-------------|-------------|
| H | 2.46306400 | -0.81487800 | 1.29898600  |
| O | 1.43523800 | -1.59094100 | -1.29170500 |
| H | 2.16695200 | -0.97188700 | -1.13029400 |
| H | 0.72282900 | -1.08683800 | -1.72272500 |
| O | 0.52985900 | -2.90726100 | 0.81453200  |
| H | 0.95531200 | -2.47025800 | 0.02739000  |
| H | 0.58626400 | -3.85632000 | 0.66877500  |

---

F(A)(W)<sub>13</sub>

---

| Symbol | Coordinate  |             |             |
|--------|-------------|-------------|-------------|
|        | X           | Y           | Z           |
| C      | 0.12732100  | 2.89977700  | -0.68864000 |
| O      | -0.26914900 | 2.84638000  | 0.48026300  |
| H      | -0.57210800 | 3.15398800  | -1.49882600 |
| O      | 1.32688100  | 2.68022700  | -1.09501100 |
| H      | 2.02280200  | 2.32079200  | -0.32463300 |
| N      | -1.16904900 | -2.17229300 | -0.41329200 |
| H      | -1.50693300 | -2.28844800 | 0.54322600  |
| H      | -0.98507600 | -1.17545500 | -0.53221900 |
| H      | -1.95741800 | -2.37039900 | -1.02845600 |
| O      | 2.50513100  | -1.47112100 | -2.09555500 |
| H      | 2.01166700  | -2.24987800 | -1.76405300 |
| H      | 1.85332100  | -0.84985200 | -2.48713800 |
| O      | -3.85095900 | -0.33830300 | 0.77438700  |
| H      | -3.28102000 | -0.79467400 | 1.42616800  |
| H      | -3.55093200 | 0.58334200  | 0.73666800  |
| O      | 0.32665900  | -0.89783600 | 2.88052800  |
| H      | 1.03396300  | -1.39330600 | 2.40635300  |
| H      | 0.57044600  | 0.03993400  | 2.85647700  |
| O      | 3.83415700  | -0.49152300 | -0.18855500 |
| H      | 3.32717300  | -0.86868100 | -0.99912300 |
| H      | 4.77682200  | -0.57774200 | -0.36352000 |
| O      | 1.11270300  | -3.42195500 | -0.76690200 |
| H      | 0.17483700  | -3.01122600 | -0.66219800 |
| H      | 1.02097300  | -4.35143300 | -0.99631000 |
| O      | -1.79942900 | 0.61047900  | -1.87509800 |
| H      | -2.46527200 | -0.07018600 | -2.08978400 |
| H      | -2.26778900 | 1.23630200  | -1.29960100 |
| O      | 1.10740300  | 1.86687000  | 2.64392600  |
| H      | 1.13091000  | 2.42026500  | 3.43109900  |
| H      | 0.53484900  | 2.30677700  | 1.98202600  |
| O      | -3.76612300 | -1.33593900 | -1.69241800 |
| H      | -3.91260800 | -1.03323500 | -0.75946500 |
| H      | -4.62662700 | -1.47132500 | -2.09866700 |
| O      | 0.79075000  | 0.47845600  | -2.99021600 |
| H      | 1.18280800  | 1.30889000  | -2.69099500 |
| H      | -0.13168300 | 0.50255600  | -2.67452300 |
| O      | -2.11862000 | -1.69286400 | 2.45298400  |
| H      | -2.41830800 | -2.17583800 | 3.22839100  |

---

|   |             |             |            |
|---|-------------|-------------|------------|
| H | -1.19741200 | -1.36075500 | 2.65348300 |
| O | 2.90708800  | 1.82879100  | 0.55041300 |
| H | 2.51434200  | 1.73591800  | 1.43816600 |
| H | 3.30053800  | 0.94975800  | 0.27409900 |
| O | 2.25682200  | -2.21538700 | 1.48954600 |
| H | 1.90394600  | -2.78164100 | 0.77797500 |
| H | 2.93340600  | -1.66143100 | 1.06816500 |
| O | -2.91533400 | 2.31013200  | 0.15935400 |
| H | -2.05025400 | 2.63594300  | 0.48220700 |
| H | -3.53376800 | 3.04719100  | 0.16872100 |

---

F(A)(W)<sub>15</sub>

---

| Symbol | Coordinate  |             |             |
|--------|-------------|-------------|-------------|
|        | X           | Y           | Z           |
| C      | 0.61515800  | 1.84645300  | 1.76561700  |
| O      | 0.36273900  | 2.43917300  | 0.68341900  |
| H      | -0.23507700 | 1.70562900  | 2.46091600  |
| O      | 1.72401200  | 1.38226700  | 2.13090500  |
| H      | 1.17775200  | -0.33701100 | 2.81701700  |
| N      | 3.64703000  | 1.25274500  | 0.29064100  |
| H      | 3.63198900  | 2.13338000  | -0.23234400 |
| H      | 3.36934200  | 0.49500000  | -0.35001000 |
| H      | 4.57601900  | 1.01753200  | 0.66063600  |
| O      | -4.82280200 | 0.09532300  | -1.87104200 |
| H      | -3.90346400 | -0.21755000 | -1.92013000 |
| H      | -4.77040200 | 1.04992300  | -1.67059100 |
| O      | 5.89275100  | -0.38323900 | 0.65917600  |
| H      | 5.29521600  | -1.06301400 | 0.29125900  |
| H      | 6.53670700  | -0.82260000 | 1.22051600  |
| O      | 0.66925400  | -1.16663100 | 2.78103300  |
| H      | -0.27834400 | -0.90644300 | 2.69344400  |
| H      | 1.14726400  | -2.04185600 | 1.63152100  |
| O      | -2.20863800 | 1.50859900  | 0.31447900  |
| H      | -1.34880000 | 1.97800300  | 0.31214500  |
| H      | -2.12134000 | 0.73717100  | -0.28719300 |
| O      | -2.25288900 | -0.84455900 | -1.11488100 |
| H      | -2.58035700 | -1.47559100 | -0.44422900 |
| H      | -1.37472200 | -1.16352700 | -1.39738900 |
| O      | 2.01177200  | 0.62089200  | -2.03512800 |
| H      | 1.21937900  | 0.18361800  | -1.67762400 |
| H      | 1.89817100  | 1.58651700  | -1.97457200 |
| O      | -4.34275800 | 2.67066900  | -0.92029200 |
| H      | -4.91005300 | 3.23445300  | -0.38783200 |
| H      | -3.57726700 | 2.40964400  | -0.36493800 |
| O      | 0.39289500  | -1.58843900 | -1.47478100 |
| H      | 0.93850700  | -1.96102500 | -2.18507800 |
| H      | 0.69679900  | -2.01225700 | -0.64367400 |
| O      | -1.92412100 | -0.41528300 | 2.40344300  |
| H      | -2.50245100 | -1.12965100 | 2.08453000  |

---

|   |             |             |             |
|---|-------------|-------------|-------------|
| H | -2.09265200 | 0.33388000  | 1.80265200  |
| O | -5.79843500 | -1.28171800 | 0.15378800  |
| H | -5.52968700 | -0.73937600 | -0.63989000 |
| H | -6.33334900 | -0.71780400 | 0.71992700  |
| O | -3.51317200 | -2.25378800 | 0.94431800  |
| H | -3.57013700 | -3.20900300 | 1.04313000  |
| H | -4.43313000 | -1.92442700 | 0.73294500  |
| O | 2.12305100  | 3.20501500  | -1.07189300 |
| H | 1.95876700  | 4.09470800  | -1.39761500 |
| H | 1.43908300  | 3.00480400  | -0.36682200 |
| O | 2.73275800  | -1.69836500 | -3.10732200 |
| H | 2.61686300  | -0.72708000 | -3.04246800 |
| H | 3.08441200  | -1.90705600 | -3.97765100 |
| O | 3.72074200  | -1.61158100 | -0.44403400 |
| H | 3.54526300  | -1.81743800 | -1.37774600 |
| H | 3.00122500  | -2.02548200 | 0.07319300  |
| O | 1.46794800  | -2.60479700 | 0.84228500  |
| H | 2.91067900  | 1.32432000  | 1.06405700  |
| H | 1.41677400  | -3.52662800 | 1.11392300  |

| F(A)(W) <sub>17</sub> |             |             |             |
|-----------------------|-------------|-------------|-------------|
| Symbol                | Coordinate  |             |             |
|                       | X           | Y           | Z           |
| C                     | -2.72525300 | 3.83244500  | -0.68927800 |
| O                     | -1.60511400 | 4.20707900  | -0.37490300 |
| H                     | -3.55032100 | 4.55072400  | -0.80151300 |
| O                     | -3.08703300 | 2.60550800  | -0.92330100 |
| H                     | -2.28161700 | 1.88787600  | -0.80931100 |
| N                     | -1.43396000 | 0.42971500  | 1.97109600  |
| H                     | -2.39571500 | 0.56374500  | 2.27725800  |
| H                     | -0.81300000 | 0.99472100  | 2.54609900  |
| H                     | -1.22658100 | -0.55739000 | 2.12379100  |
| O                     | -1.34829200 | 0.90139800  | -0.63163500 |
| H                     | -1.66725200 | 0.09777200  | -1.10114200 |
| H                     | -1.34256300 | 0.69514200  | 0.37495700  |
| O                     | -2.54635600 | -1.12928200 | -2.05608900 |
| H                     | -2.47343700 | -2.03744000 | -1.72305600 |
| H                     | -3.42469200 | -0.78227700 | -1.78812400 |
| O                     | 2.00568200  | -3.08294700 | 0.95142000  |
| H                     | 2.02639800  | -2.18977500 | 1.33303900  |
| H                     | 2.27896800  | -2.97660300 | 0.01594300  |
| O                     | 2.30680600  | -0.31491300 | 1.53044200  |
| H                     | 3.22392400  | -0.00259200 | 1.44252700  |
| H                     | 1.85294500  | 0.37506200  | 2.05657000  |
| O                     | 4.30802400  | -0.14776900 | -1.69743700 |
| H                     | 4.65237500  | 0.23879100  | -0.86683200 |
| H                     | 4.94298500  | 0.03901900  | -2.39568400 |
| O                     | 0.70278000  | 2.81435100  | 0.04815500  |
| H                     | -0.12350400 | 3.31699000  | -0.12926300 |

|   |             |             |             |
|---|-------------|-------------|-------------|
| H | 0.67479000  | 2.00331200  | -0.49862400 |
| O | -1.11902800 | -3.23352600 | -0.95007700 |
| H | -0.72585600 | -3.99028900 | -0.48334500 |
| H | -0.40665300 | -2.72699400 | -1.38613000 |
| O | -4.63448600 | 0.12328600  | -0.81147600 |
| H | -4.46457300 | 1.07466000  | -0.84754800 |
| H | -4.49597200 | -0.15222300 | 0.11446900  |
| O | -4.12371500 | -0.88157700 | 1.77569400  |
| H | -3.42382100 | -1.57113200 | 1.75748700  |
| H | -4.89876200 | -1.28138200 | 2.18176600  |
| O | -0.11380900 | -4.59411900 | 1.27618200  |
| H | 0.13961500  | -5.47760900 | 1.55826800  |
| H | 0.72132200  | -4.05084400 | 1.22542200  |
| O | 1.62333600  | 0.46170800  | -1.04620100 |
| H | 1.77421700  | 0.06121300  | -0.16374200 |
| H | 2.49212700  | 0.45420700  | -1.48073300 |
| O | -1.91937900 | -2.45694700 | 1.55542600  |
| H | -1.69173500 | -2.53660900 | 0.60499700  |
| H | -1.52188700 | -3.26137300 | 1.92492900  |
| O | 0.25779300  | -1.38879000 | -2.47942200 |
| H | 0.56526200  | -0.60794100 | -1.97073100 |
| H | -0.60469700 | -1.16183400 | -2.85798700 |
| O | 3.28784600  | 3.36861200  | 0.39136100  |
| H | 2.32845000  | 3.25900100  | 0.17774500  |
| H | 3.61997700  | 4.07759800  | -0.16760000 |
| O | 2.71032300  | -2.57905400 | -1.67711700 |
| H | 1.94535700  | -2.30487800 | -2.20813600 |
| H | 3.34936400  | -1.85125800 | -1.72682600 |
| O | 1.07584500  | 1.93422400  | 2.57608600  |
| H | 1.58763800  | 2.58215000  | 3.07063600  |
| H | 0.87686700  | 2.33814900  | 1.69780700  |
| O | 4.63162100  | 1.10210400  | 0.71662600  |
| H | 4.16563400  | 1.97268100  | 0.59764500  |
| H | 5.40091600  | 1.26018300  | 1.27310000  |

---

F(A)(W)<sub>19</sub>

---

Coordination

---

Symbol

|   |             |             |             |
|---|-------------|-------------|-------------|
| C | -3.80488800 | -0.91699800 | 0.98226600  |
| O | -4.79791100 | -0.79428500 | 0.30143000  |
| H | -3.71744500 | -1.67088700 | 1.77834700  |
| O | -2.74365300 | -0.14016900 | 0.84106400  |
| H | -2.08431900 | -0.17552600 | 1.62895200  |
| N | -5.81149600 | 1.91745700  | -0.82717100 |
| H | -5.65115100 | 0.93109800  | -0.61399300 |
| H | -6.60649700 | 2.22522400  | -0.27598400 |
| H | -6.07597700 | 1.98661700  | -1.80455300 |
| O | 1.40725100  | -0.42333000 | 3.49046200  |
| H | 1.65383300  | -0.16417300 | 4.38402200  |

---

|   |             |             |             |
|---|-------------|-------------|-------------|
| H | 1.81236000  | 0.22026700  | 2.85881200  |
| O | -1.16619600 | 2.79809000  | 1.98221800  |
| H | -0.39130700 | 3.09423000  | 1.47534200  |
| H | -1.94320400 | 2.99317500  | 1.43137200  |
| O | -1.13585500 | -2.33728300 | -2.56452500 |
| H | -0.28755800 | -2.80132900 | -2.55304100 |
| H | -0.98097900 | -1.44882500 | -2.93202000 |
| O | 2.04708600  | -2.83068300 | 2.18100400  |
| H | 1.90694500  | -2.05570600 | 2.75364100  |
| H | 1.17613100  | -3.04017500 | 1.79355300  |
| O | 1.65793700  | -0.42368900 | -2.14936000 |
| H | 1.04536100  | -0.33209500 | -1.37634900 |
| H | 1.17205500  | -0.07697200 | -2.91507600 |
| O | -3.23416800 | 2.48544200  | 0.04964900  |
| H | -3.21776600 | 1.56885100  | 0.38226500  |
| H | -4.14772000 | 2.57046600  | -0.31456900 |
| O | 5.19849800  | 2.27911000  | -0.67777100 |
| H | 4.86765900  | 1.35974900  | -0.64085800 |
| H | 5.82582400  | 2.38019000  | 0.04417200  |
| O | -1.00032800 | 1.69614600  | -1.26608600 |
| H | -0.87615100 | 0.92867200  | -0.66749700 |
| H | -1.84120200 | 2.11947200  | -0.98018100 |
| O | 0.17500500  | -0.35101100 | 0.06852800  |
| H | -0.05945200 | -1.27395900 | 0.31803700  |
| H | 0.80388700  | -0.00138700 | 0.72934200  |
| O | 3.75151300  | -2.79630000 | 0.19874000  |
| H | 3.15131800  | -2.79701900 | 1.00076900  |
| H | 4.50401300  | -3.35828400 | 0.40930300  |
| O | -0.64589600 | 0.30925000  | -3.51490000 |
| H | -0.90063100 | 0.93176700  | -2.78861700 |
| H | -1.04652100 | 0.62077300  | -4.33181800 |
| O | 1.57921100  | -3.11981100 | -1.63026900 |
| H | 2.40353600  | -3.34526900 | -1.16693700 |
| H | 1.71955800  | -2.19965200 | -1.93458800 |
| O | -0.14042700 | -3.00944100 | 0.53274200  |
| H | -1.06896600 | -3.27202500 | 0.38337100  |
| H | 0.35628900  | -3.19634800 | -0.29253800 |
| O | 3.22922500  | 4.17669300  | -0.89279500 |
| H | 3.95869200  | 3.52318000  | -0.84206100 |
| H | 3.36883700  | 4.69817100  | -1.68775400 |
| O | -1.28724500 | 0.22007100  | 2.83648000  |
| H | -1.16033800 | 1.18189400  | 2.65508300  |
| H | -0.42328100 | -0.14510200 | 3.09427800  |
| O | -2.67472100 | -3.03838900 | -0.42221400 |
| H | -3.46579900 | -3.53181900 | -0.65775200 |
| H | -2.28044800 | -2.70528700 | -1.25689500 |
| O | 3.84148300  | -0.11732500 | -0.52669600 |
| H | 3.98499000  | -1.05595900 | -0.28632500 |
| H | 3.21025400  | -0.13168400 | -1.27473400 |
| O | 0.99463800  | 3.03426200  | 0.16004200  |

---

|   |            |            |             |
|---|------------|------------|-------------|
| H | 0.41519300 | 2.66522700 | -0.53523800 |
| H | 1.69427600 | 3.57214000 | -0.26800100 |
| O | 2.19453600 | 0.98557000 | 1.41973400  |
| H | 1.82500900 | 1.81400800 | 1.02769700  |
| H | 2.88061600 | 0.65075400 | 0.80580000  |

---



Table S2. ZPE-corrected binding energies ( $\Delta E_{\text{ZPE}}$ ) (in kcal/mol) for various isomers of  $\text{F}(\text{W})_n$  and  $\text{F}(\text{A})(\text{W})_{n-1}$  clusters ( $n=1-8, 10, 12, 14, 16, 18, 20$ ), and ZPE-corrected successive binding energies ( $\Delta E_{\text{ZPE},n}$ ) of  $\text{F}(\text{W})_n$  ( $n=1-8$ ) clusters at absolute zero temperature (0 K).

| Cluster $\text{F}(\text{W})_n$ | Functional      | $\Delta E_{\text{ZPE}}$ | $E_{\text{ZPE},n}$ | Cluster $\text{F}(\text{A})(\text{W})_{n-1}$ | Functional      | $\Delta E_{\text{ZPE}}$ |
|--------------------------------|-----------------|-------------------------|--------------------|----------------------------------------------|-----------------|-------------------------|
| n=1                            | B3LYP           | -10.91                  | -10.91             | n=1                                          | B3LYP           | -15.57                  |
|                                | CAM-B3LYP       | -12.51                  | -12.51             |                                              | CAM-B3LYP       | -13.83                  |
|                                | M06-2X          | -12.84                  | -12.84             |                                              | M06-2X          | -14.45                  |
|                                | $\omega$ B97x-D | -11.94                  | -11.94             |                                              | $\omega$ B97x-D | -14.10                  |
| n=2                            | B3LYP           | -19.88                  | -8.97              | n=2                                          | B3LYP           | -19.24                  |
|                                | CAM-B3LYP       | -22.70                  | -10.18             |                                              | CAM-B3LYP       | -21.72                  |
|                                | M06-2X          | -22.50                  | -9.66              |                                              | M06-2X          | -21.95                  |
|                                | $\omega$ B97x-D | -21.70                  | -9.76              |                                              | $\omega$ B97x-D | -21.55                  |
| n=3                            | B3LYP           | -25.90                  | -6.01              | n=3                                          | B3LYP           | -22.74                  |
|                                | CAM-B3LYP       | -29.70                  | -7.01              |                                              | CAM-B3LYP       | -25.99                  |
|                                | M06-2X          | -28.70                  | -6.20              |                                              | M06-2X          | -26.46                  |
|                                | $\omega$ B97x-D | -27.75                  | -6.04              |                                              | $\omega$ B97x-D | -25.74                  |
| n=4                            | B3LYP           | -31.31                  | -5.42              | n=4                                          | B3LYP           | -27.58                  |
|                                | CAM-B3LYP       | -36.52                  | -6.82              |                                              | CAM-B3LYP       | -31.57                  |
|                                | M06-2X          | -36.21                  | -7.51              |                                              | M06-2X          | -32.84                  |
|                                | $\omega$ B97x-D | -34.91                  | -7.16              |                                              | $\omega$ B97x-D | -31.38                  |
| n=5                            | B3LYP           | -36.84                  | -5.53              | n=5                                          | B3LYP           | -33.99                  |
|                                | CAM-B3LYP       | -43.18                  | -6.66              |                                              | CAM-B3LYP       | -39.59                  |
|                                | M06-2X          | -44.09                  | -7.88              |                                              | M06-2X          | -40.65                  |
|                                | $\omega$ B97x-D | -41.88                  | -6.98              |                                              | $\omega$ B97x-D | -39.30                  |
| n=6                            | B3LYP           | -45.33                  | -8.48              | n=6                                          | B3LYP           | -42.42                  |
|                                | CAM-B3LYP       | -52.10                  | -8.92              |                                              | CAM-B3LYP       | -50.94                  |
|                                | M06-2X          | -50.37                  | -6.28              |                                              | M06-2X          | -51.47                  |
|                                | $\omega$ B97x-D | -48.82                  | -6.93              |                                              | $\omega$ B97x-D | -48.96                  |
| n=7                            | B3LYP           | -50.64                  | -5.31              | n=7                                          | B3LYP           | -52.51                  |
|                                | CAM-B3LYP       | -60.48                  | -8.37              |                                              | CAM-B3LYP       | -61.42                  |
|                                | M06-2X          | -62.31                  | -11.94             |                                              | M06-2X          | -62.72                  |
|                                | $\omega$ B97x-D | -59.45                  | -10.63             |                                              | $\omega$ B97x-D | -60.95                  |
| n=8                            | B3LYP           | -57.87                  | -7.22              | n=8                                          | B3LYP           | -54.64                  |
|                                | CAM-B3LYP       | -68.57                  | -8.09              |                                              | CAM-B3LYP       | -64.86                  |
|                                | M06-2X          | -70.24                  | -7.92              |                                              | M06-2X          | -68.04                  |
|                                | $\omega$ B97x-D | -66.99                  | -7.54              |                                              | $\omega$ B97x-D | -65.62                  |
| n=10                           | B3LYP           | -71.38                  |                    | n=10                                         | B3LYP           | -67.16                  |
|                                | CAM-B3LYP       | -84.36                  |                    |                                              | CAM-B3LYP       | -79.14                  |
|                                | M06-2X          | -83.48                  |                    |                                              | M06-2X          | -83.25                  |
|                                | $\omega$ B97x-D | -81.30                  |                    |                                              | $\omega$ B97x-D | -79.51                  |
| n=12                           | B3LYP           | -79.03                  |                    | n=12                                         | B3LYP           | -77.28                  |
|                                | CAM-B3LYP       | -98.45                  |                    |                                              | CAM-B3LYP       | -95.71                  |
|                                | M06-2X          | -107.16                 |                    |                                              | M06-2X          | -104.27                 |
|                                | $\omega$ B97x-D | -100.69                 |                    |                                              | $\omega$ B97x-D | -97.65                  |
| n=14                           | B3LYP           | -99.02                  |                    | n=14                                         | B3LYP           | -99.82                  |
|                                | CAM-B3LYP       | -119.32                 |                    |                                              | CAM-B3LYP       | -116.72                 |
|                                | M06-2X          | -121.48                 |                    |                                              | M06-2X          | -119.47                 |
|                                | $\omega$ B97x-D | -117.57                 |                    |                                              | $\omega$ B97x-D | -115.74                 |
| n=16                           | B3LYP           | -110.77                 |                    | n=16                                         | B3LYP           | -115.62                 |
|                                | CAM-B3LYP       | -134.39                 |                    |                                              | CAM-B3LYP       | -135.18                 |
|                                | M06-2X          | -137.49                 |                    |                                              | M06-2X          | -138.21                 |
|                                | $\omega$ B97x-D | -132.69                 |                    |                                              | $\omega$ B97x-D | -134.86                 |
| n=18                           | B3LYP           | -124.32                 |                    | n=18                                         | B3LYP           | -118.70                 |
|                                | CAM-B3LYP       | -151.26                 |                    |                                              | CAM-B3LYP       | -145.87                 |
|                                | M06-2X          | -156.05                 |                    |                                              | M06-2X          | -154.62                 |
|                                | $\omega$ B97x-D | -150.60                 |                    |                                              | $\omega$ B97x-D | -147.42                 |
| n=20                           | B3LYP           | -132.86                 |                    | n=20                                         | B3LYP           | -133.91                 |
|                                | CAM-B3LYP       | -164.12                 |                    |                                              | CAM-B3LYP       | -164.44                 |
|                                | M06-2X          | -173.60                 |                    |                                              | M06-2X          | -173.01                 |
|                                | $\omega$ B97x-D | -165.78                 |                    |                                              | $\omega$ B97x-D | -166.80                 |

Method<sup>1</sup>: B3LYP/6-311++G(2d,2p)// B3LYP/6-31++G(d,p), Method<sup>2</sup>: CAM-B3LYP/6-311++G(2d,2p)// CAM-B3LYP/6-31++G(d,p),  
Method<sup>3</sup>: M06-2X/6-311++G(2d,2p)// M06-2X/6-31++G(d,p), Method<sup>4</sup>:  $\omega$ B97x-D/6-311++G(2d,2p)//  $\omega$ B97x-D/6-31++G(d,p),

F = HCOOH, A = NH<sub>3</sub>, W = H<sub>2</sub>O

Table S3. Binding energies ( $\Delta E_B$ ) (in kcal/mol), BSSE-corrected binding energies ( $\Delta E_{CP}$ ) (in kcal/mol) for various isomers of  $F(W)_n$  and  $F(A)(W)_{n-1}$  clusters ( $n= 1-8, 10, 12, 14, 16, 18, 20$ ), and successive binding energies ( $\Delta E_n$ ) of  $F(W)_n$  ( $n= 1-8$ ) clusters at temperature (298.15 K), and pressure (1013.25 hPa).

| Cluster $F(W)_n$ | Functional      | $\Delta E_B$ | $\Delta E_{CP}$ | $\Delta E_n$ | Cluster $F(A)(W)_{n-1}$ | Functional      | $\Delta E_B$ | $\Delta E_{CP}$ | $\Delta E_W$ | $\Delta E_A$ |
|------------------|-----------------|--------------|-----------------|--------------|-------------------------|-----------------|--------------|-----------------|--------------|--------------|
| n=1              | B3LYP           | -13.80       | -13.30          | -13.30       | n=1                     | B3LYP           | -14.95       | -14.54          |              |              |
|                  | CAM-B3LYP       | -15.52       | -15.02          | -15.02       |                         | CAM-B3LYP       | -16.37       | -15.95          |              |              |
|                  | M06-2X          | -15.81       | -15.28          | -15.28       |                         | M06-2X          | -16.80       | -16.32          |              |              |
|                  | $\omega$ B97x-D | -15.15       | -14.64          | -14.64       |                         | $\omega$ B97x-D | -16.60       | -16.23          |              |              |
| n=2              | B3LYP           | -25.16       | -23.99          | -11.36       | n=2                     | B3LYP           | -24.22       | -23.22          | -9.28        | -10.42       |
|                  | CAM-B3LYP       | -28.16       | -26.99          | -12.63       |                         | CAM-B3LYP       | -26.89       | -26.14          | -10.52       | -11.37       |
|                  | M06-2X          | -27.58       | -26.32          | -11.77       |                         | M06-2X          | -26.61       | -25.47          | -9.82        | -10.80       |
|                  | $\omega$ B97x-D | -23.15       | -26.28          | -8.00        |                         | $\omega$ B97x-D | -26.77       | -25.80          | -10.17       | -11.62       |
| n=3              | B3LYP           | -33.85       | -32.14          | -8.68        | n=3                     | B3LYP           | -30.07       | -28.53          | -5.85        | -4.91        |
|                  | CAM-B3LYP       | -37.90       | -36.19          | -9.73        |                         | CAM-B3LYP       | -33.60       | -32.04          | -6.71        | -5.45        |
|                  | M06-2X          | -36.41       | -34.58          | -8.83        |                         | M06-2X          | -33.65       | -31.87          | -7.01        | -6.07        |
|                  | $\omega$ B97x-D | -36.54       | -34.83          | -13.40       |                         | $\omega$ B97x-D | -33.58       | -32.04          | -6.81        | -10.43       |
| n=4              | B3LYP           | -43.09       | -40.68          | -9.24        | n=4                     | B3LYP           | -37.10       | -35.63          | -7.03        | -3.25        |
|                  | CAM-B3LYP       | -48.57       | -46.17          | -10.68       |                         | CAM-B3LYP       | -41.38       | -39.28          | -7.77        | -3.49        |
|                  | M06-2X          | -47.02       | -45.25          | -10.61       |                         | M06-2X          | -42.47       | -40.06          | -8.82        | -6.06        |
|                  | $\omega$ B97x-D | -47.64       | -45.22          | -11.09       |                         | $\omega$ B97x-D | -41.70       | -39.58          | -8.12        | -5.16        |
| n=5              | B3LYP           | -49.43       | -46.51          | -6.34        | n=5                     | B3LYP           | -45.93       | -43.37          | -8.83        | -2.84        |
|                  | CAM-B3LYP       | -56.31       | -53.41          | -7.74        |                         | CAM-B3LYP       | -52.14       | -49.48          | -10.77       | -3.57        |
|                  | M06-2X          | -56.76       | -53.64          | -9.74        |                         | M06-2X          | -52.41       | -49.40          | -9.94        | -5.39        |
|                  | $\omega$ B97x-D | -55.78       | -52.81          | -8.14        |                         | $\omega$ B97x-D | -52.21       | -49.45          | -10.51       | -4.57        |
| n=6              | B3LYP           | -58.77       | -55.32          | -9.34        | n=6                     | B3LYP           | -57.18       | -53.72          | -11.25       | -7.74        |
|                  | CAM-B3LYP       | -66.27       | -62.82          | -9.96        |                         | CAM-B3LYP       | -66.31       | -62.92          | -14.17       | -10.00       |
|                  | M06-2X          | -64.04       | -60.29          | -7.30        |                         | M06-2X          | -66.28       | -62.45          | -13.87       | -9.52        |
|                  | $\omega$ B97x-D | -63.90       | -60.48          | -8.12        |                         | $\omega$ B97x-D | -65.51       | -61.69          | -13.30       | -9.73        |
| n=7              | B3LYP           | -71.20       | -66.82          | -12.43       | n=7                     | B3LYP           | -70.85       | -66.45          | -13.67       | -12.08       |
|                  | CAM-B3LYP       | -80.62       | -76.24          | -14.35       |                         | CAM-B3LYP       | -80.40       | -75.99          | -14.09       | -4.16        |
|                  | M06-2X          | -80.30       | -75.63          | -16.26       |                         | M06-2X          | -80.65       | -75.80          | -14.37       | -16.61       |
|                  | $\omega$ B97x-D | -79.67       | -75.12          | -15.78       |                         | $\omega$ B97x-D | -80.46       | -76.06          | -14.95       | -16.56       |
| n=8              | B3LYP           | -80.50       | -75.37          | -9.30        | n=8                     | B3LYP           | -75.37       | -70.44          | -4.52        | -4.17        |
|                  | CAM-B3LYP       | -91.43       | -86.32          | -10.81       |                         | CAM-B3LYP       | -86.36       | -81.43          | -5.97        | -5.75        |
|                  | M06-2X          | -91.11       | -85.50          | -10.80       |                         | M06-2X          | -88.57       | -83.06          | -7.91        | -8.27        |
|                  | $\omega$ B97x-D | -90.57       | -90.57          | -10.89       |                         | $\omega$ B97x-D | -87.55       | -82.55          | -7.09        | -7.88        |
| n=10             | B3LYP           | -97.19       | -90.38          |              | n=10                    | B3LYP           | -91.11       | -84.44          |              |              |
|                  | CAM-B3LYP       | -111.17      | -104.57         |              |                         | CAM-B3LYP       | -106.25      | -99.77          |              |              |
|                  | M06-2X          | -109.09      | -101.87         |              |                         | M06-2X          | -108.72      | -101.65         |              |              |
|                  | $\omega$ B97x-D | -108.91      | -102.22         |              |                         | $\omega$ B97x-D | -107.45      | -100.90         |              |              |
| n=12             | B3LYP           | -112.78      | -103.79         |              | n=12                    | B3LYP           | -108.98      | -100.76         |              |              |
|                  | CAM-B3LYP       | -133.13      | -124.44         |              |                         | CAM-B3LYP       | -128.49      | -120.53         |              |              |
|                  | M06-2X          | -140.41      | -130.93         |              |                         | M06-2X          | -135.51      | -126.85         |              |              |
|                  | $\omega$ B97x-D | -136.02      | -127.05         |              |                         | $\omega$ B97x-D | -131.43      | -123.30         |              |              |
| n=14             | B3LYP           | -137.60      | -127.40         |              | n=14                    | B3LYP           | -133.01      | -123.36         |              |              |
|                  | CAM-B3LYP       | -159.10      | -149.20         |              |                         | CAM-B3LYP       | -154.17      | -144.82         |              |              |
|                  | M06-2X          | -159.53      | -148.65         |              |                         | M06-2X          | -155.43      | -145.21         |              |              |
|                  | $\omega$ B97x-D | -158.43      | -148.33         |              |                         | $\omega$ B97x-D | -153.94      | -144.43         |              |              |
| n=16             | B3LYP           | -155.08      | -143.38         |              | n=16                    | B3LYP           | -155.75      | -144.78         |              |              |
|                  | CAM-B3LYP       | -180.02      | -168.68         |              |                         | CAM-B3LYP       | -180.11      | -169.46         |              |              |
|                  | M06-2X          | -181.06      | -168.62         |              |                         | M06-2X          | -181.20      | -170.35         |              |              |
|                  | $\omega$ B97x-D | -179.52      | -167.94         |              |                         | $\omega$ B97x-D | -183.44      | -172.75         |              |              |
| n=18             | B3LYP           | -173.77      | -160.32         |              | n=18                    | B3LYP           | -166.88      | -153.92         |              |              |
|                  | CAM-B3LYP       | -202.20      | -189.17         |              |                         | CAM-B3LYP       | -195.53      | -182.97         |              |              |
|                  | M06-2X          | -204.53      | -190.30         |              |                         | M06-2X          | -202.37      | -188.65         |              |              |
|                  | $\omega$ B97x-D | -203.14      | -189.82         |              |                         | $\omega$ B97x-D | -198.37      | -185.51         |              |              |
| n=20             | B3LYP           | -188.03      | -172.98         |              | n=20                    | B3LYP           | -188.90      | -174.41         |              |              |
|                  | CAM-B3LYP       | -220.84      | -206.28         |              |                         | CAM-B3LYP       | -221.11      | -207.07         |              |              |
|                  | M06-2X          | -228.15      | -212.25         |              |                         | M06-2X          | -227.12      | -211.75         |              |              |
|                  | $\omega$ B97x-D | -224.17      | -209.20         |              |                         | $\omega$ B97x-D | -225.03      | -210.65         |              |              |

Method<sup>1</sup>: B3LYP/6-311++G(2d,2p)// B3LYP/6-31++G(d,p), Method<sup>2</sup>: CAM-B3LYP/6-311++G(2d,2p)// CAM-B3LYP/6-31++G(d,p),  
Method<sup>3</sup>: M06-2X/6-311++G(2d,2p)// M06-2X/6-31++G(d,p), Method<sup>4</sup>:  $\omega$ B97x-D/6-311++G(2d,2p)//  $\omega$ B97x-D/6-31++G(d,p),

F = HCOOH, A = NH<sub>3</sub>, W = H<sub>2</sub>O, and  $\Delta E_W: E_{F(W)_n(A)} - E_{F(W)_{n-1}(A)}$ ,  $\Delta E_A: E_{F(W)_n(A)} - E_{F(W)_n}$

Table S4. Binding enthalpies ( $\Delta H_B$ ) (in kcal/mol) for various isomers of  $F(W)_n$  and  $F(A)(W)_{n-1}$  clusters ( $n= 1-8, 10, 12, 14, 16, 18, 20$ ), and successive binding enthalpies ( $\Delta H_n$ ) of  $F(W)_n$  clusters at M06-2X/6-311++G(2d,2p) level of theory at temperature (298.15 K), and pressure (1013.25 hPa).

| Cluster $F(W)_n$ | $\Delta H_B$ | $\Delta H_n$ | Cluster $F(A)(W)_{n-1}$ | $\Delta H_B$ | $\Delta H_W$ | $\Delta H_A$ |
|------------------|--------------|--------------|-------------------------|--------------|--------------|--------------|
| n=1              | -13.77       | -13.77       | n=1                     | -15.26       |              |              |
| n=2              | -24.01       | -10.24       | n=2                     | -23.62       | -8.36        | -9.85        |
| n=3              | -31.20       | -7.20        | n=3                     | -28.84       | -5.22        | -4.83        |
| n=4              | -39.72       | -8.52        | n=4                     | -35.96       | -7.12        | -4.76        |
| n=5              | -47.41       | -7.70        | n=5                     | -44.40       | -8.44        | -4.68        |
| n=6              | -54.09       | -6.67        | n=6                     | -56.38       | -11.98       | -8.96        |
| n=7              | -67.57       | -13.49       | n=7                     | -68.89       | -12.51       | -18.51       |
| n=8              | -76.10       | -8.53        | n=8                     | -74.65       | -7.08        | -5.76        |
| n=10             | -92.02       |              | n=10                    | -91.51       |              |              |
| n=12             | -118.07      |              | n=12                    | -114.63      |              |              |
| n=14             | -134.09      |              | n=14                    | -131.77      |              |              |
| n=16             | -151.96      |              | n=16                    | -152.10      |              |              |
| n=18             | -172.09      |              | n=18                    | -170.23      |              |              |
| n=20             | -191.61      |              | n=20                    | -190.45      |              |              |

$$F = \text{HCOOH}, A = \text{NH}_3, W = \text{H}_2\text{O}, \Delta H_W: H_{F(W)_n(A)} - H_{F(W)_{n-1}(A)}, \Delta H_A: H_{F(W)_n(A)} - H_{F(W)_n}$$

Table S5. Calculated binding enthalpies,  $\Delta H_B$  of the  $F(W)_n$  clusters ( $n = 1-8, 10, 12, 14, 16, 18, 20$ ) (in kcal/mol) at the M06-2X/6-311++G(2d,2p)//M06-2X/6-31++G(d,p) level of theory at various temperature (T) and pressure (P).

| T<br>(K) | P<br>(hPa) | Number of water molecules n |        |        |        |        |        |        |        |        |    |    |    |    |    |
|----------|------------|-----------------------------|--------|--------|--------|--------|--------|--------|--------|--------|----|----|----|----|----|
|          |            | 1                           | 2      | 3      | 4      | 5      | 6      | 7      | 8      | 10     | 12 | 14 | 16 | 18 | 20 |
| 216.65   | 226.32     | -13.80                      | -24.08 | -31.22 | -39.68 | -47.65 | -54.38 | -67.76 | -76.30 | -91.85 | -  | -  | -  | -  | -  |
| 226.75   | 287        | -13.79                      | -24.09 | -31.24 | -39.71 | -47.65 | -54.37 | -67.78 | -76.32 | -91.93 | -  | -  | -  | -  | -  |
| 236.65   | 360        | -13.79                      | -24.08 | -31.25 | -39.73 | -47.64 | -54.36 | -67.78 | -76.32 | -91.99 | -  | -  | -  | -  | -  |
| 246.55   | 446        | -13.79                      | -24.07 | -31.25 | -39.75 | -47.62 | -54.34 | -67.78 | -76.32 | -92.04 | -  | -  | -  | -  | -  |
| 256.45   | 549        | -13.79                      | -24.07 | -31.25 | -39.75 | -47.59 | -54.30 | -67.75 | -76.30 | -92.06 | -  | -  | -  | -  | -  |
| 266.35   | 670        | -13.79                      | -24.06 | -31.25 | -39.75 | -47.56 | -54.26 | -67.73 | -76.27 | -92.07 | -  | -  | -  | -  | -  |
| 276.25   | 812        | -13.78                      | -24.04 | -31.23 | -39.75 | -47.52 | -54.21 | -67.69 | -76.22 | -92.07 | -  | -  | -  | -  | -  |
| 286.15   | 977        | -13.78                      | -24.03 | -31.22 | -39.74 | -47.48 | -54.16 | -67.64 | -76.18 | -92.05 | -  | -  | -  | -  | -  |
| 298.15   | 1013.25    | -13.77                      | -24.01 | -31.20 | -39.72 | -47.41 | -54.09 | -67.57 | -76.10 | -92.02 | -  | -  | -  | -  | -  |

Table S6. Calculated binding enthalpies,  $\Delta H_B$  of the  $F(A)(W)_{n-1}$  clusters ( $n = 1-8, 10, 12, 14, 16, 18, 20$ ) (in kcal/mol) at the M06-2X/6-311++G(2d,2p)//M06-2X/6-31++G(d,p) level of theory at various temperature (T) and pressure (P).

| T<br>(K) | P<br>(hPa) | Number of water molecules n |        |        |        |        |        |        |        |        |    |    |    |    |    |
|----------|------------|-----------------------------|--------|--------|--------|--------|--------|--------|--------|--------|----|----|----|----|----|
|          |            | 1                           | 2      | 3      | 4      | 5      | 6      | 7      | 8      | 10     | 12 | 14 | 16 | 18 | 20 |
| 216.65   | 226.32     | -15.30                      | -23.66 | -28.89 | -36.08 | -44.50 | -56.42 | -68.80 | -74.69 | -91.49 | -  | -  | -  | -  | -  |
| 226.75   | 287        | -15.30                      | -23.66 | -28.90 | -35.67 | -44.51 | -56.45 | -68.85 | -74.73 | -91.55 | -  | -  | -  | -  | -  |
| 236.65   | 360        | -15.29                      | -23.66 | -28.90 | -36.08 | -44.52 | -55.91 | -68.89 | -74.76 | -91.68 | -  | -  | -  | -  | -  |
| 246.55   | 446        | -15.29                      | -23.66 | -28.90 | -36.08 | -44.01 | -56.48 | -68.92 | -74.77 | -91.62 | -  | -  | -  | -  | -  |
| 256.45   | 549        | -15.29                      | -23.66 | -28.90 | -36.07 | -45.00 | -55.89 | -68.93 | -74.77 | -91.63 | -  | -  | -  | -  | -  |
| 266.35   | 670        | -15.28                      | -23.66 | -28.89 | -36.05 | -44.49 | -56.46 | -68.94 | -74.76 | -91.62 | -  | -  | -  | -  | -  |
| 276.25   | 812        | -15.28                      | -23.65 | -28.88 | -36.03 | -44.47 | -56.44 | -68.93 | -74.73 | -91.60 | -  | -  | -  | -  | -  |
| 286.15   | 977        | -14.14                      | -22.75 | -27.97 | -35.11 | -43.55 | -55.53 | -68.02 | -73.81 | -90.67 | -  | -  | -  | -  | -  |
| 298.15   | 1013.25    | -15.26                      | -23.62 | -28.84 | -35.96 | -44.40 | -56.38 | -68.89 | -74.65 | -91.51 | -  | -  | -  | -  | -  |

Table S7. Calculated successive free energy,  $\Delta G_n$  of the  $F(W)_n$  clusters ( $n = 1-8$ ) (in kcal/mol) at the M06-2X/6-311++G(2d,2p)//M06-2X/6-31++G(d,p) level of theory at various temperature (T) and pressure (P).

| T<br>(K) | P<br>(hPa) | Number of water molecules n |       |      |       |       |       |       |       |
|----------|------------|-----------------------------|-------|------|-------|-------|-------|-------|-------|
|          |            | 1                           | 2     | 3    | 4     | 5     | 6     | 7     | 8     |
| 216.65   | 226.32     | -6.18                       | -3.22 | 0.66 | -0.38 | -2.14 | -0.86 | -2.67 | -1.99 |
| 226.75   | 287        | -5.94                       | -3.00 | 0.92 | -0.11 | -1.97 | -0.70 | -2.28 | -1.79 |
| 236.65   | 360        | -5.70                       | -2.78 | 1.16 | 0.15  | -1.82 | -0.54 | -1.90 | -1.60 |
| 246.55   | 446        | -5.47                       | -2.57 | 1.41 | 0.40  | -1.67 | -0.39 | -1.52 | -1.42 |
| 256.45   | 549        | -5.24                       | -2.37 | 1.65 | 0.66  | -1.53 | -0.24 | -0.15 | -1.08 |
| 266.35   | 670        | -5.01                       | -2.17 | 1.88 | 0.90  | -1.39 | -0.09 | -0.78 | -1.06 |
| 276.25   | 812        | -4.80                       | -1.98 | 2.11 | 1.14  | -1.26 | -0.04 | -0.42 | -0.89 |
| 286.15   | 977        | -4.59                       | -1.80 | 2.33 | 1.38  | -1.14 | 0.17  | -0.06 | -0.73 |
| 298.15   | 1013.25    | -4.21                       | -1.45 | 2.72 | 1.78  | -0.88 | 0.45  | 0.49  | -0.41 |

Table S8. The mean isotropic ( $\bar{\alpha}$ ), anisotropic ( $\Delta\alpha$ ) polarizabilities and Rayleigh scattering intensities ( $\mathfrak{R}_n$ ) of HCOOH, H<sub>2</sub>O, and NH<sub>3</sub> are calculated at the CAM-B3LYP/aug-cc-pVDZ level of theory at the static frequency ( $\infty$ ).

| Molecule         | $\bar{\alpha}$<br>(a.u.) | $\Delta\alpha$<br>(a.u.) | $\mathfrak{R}_n$<br>(a.u.) |
|------------------|--------------------------|--------------------------|----------------------------|
| HCOOH            | 22.4635                  | 12.5219                  | 22870.18215                |
| NH <sub>3</sub>  | 13.9611                  | 1.48729                  | 8790.388864                |
| H <sub>2</sub> O | 9.31205                  | 1.129                    | 3916.819384                |

Table S9. The mean isotropic ( $\bar{\alpha}$ ), anisotropic ( $\Delta\alpha$ ) polarizabilities, and Rayleigh scattering intensities ( $\mathfrak{R}_n$ ) of  $F(W)_n$  and  $F(A)(W)_{n-1}$  ( $n = 1-8, 10, 12, 14, 16, 18, 20$ ) clusters are calculated at the CAM-B3LYP/aug-cc-pVDZ level of theory at the static frequency ( $\infty$ ). The calculated ( $\bar{\alpha}$ ), ( $\Delta\alpha$ ), and  $\mathfrak{R}_n$  are given in atomic units (a.u.).

| $F(W)_n$ |                          |                          | $F(A)(W)_{n-1}$            |    |                          |                          |                            |
|----------|--------------------------|--------------------------|----------------------------|----|--------------------------|--------------------------|----------------------------|
| n        | $\bar{\alpha}$<br>(a.u.) | $\Delta\alpha$<br>(a.u.) | $\mathfrak{R}_n$<br>(a.u.) | n  | $\bar{\alpha}$<br>(a.u.) | $\Delta\alpha$<br>(a.u.) | $\mathfrak{R}_n$<br>(a.u.) |
| 1        | 31.45                    | 12.48                    | 44671.85                   | 1  | 36.19                    | 14.25                    | 59122.47                   |
| 2        | 42.02                    | 16.40                    | 79668.82                   | 2  | 46.44                    | 17.86                    | 97282.49                   |
| 3        | 51.93                    | 18.87                    | 121597.93                  | 3  | 56.01                    | 17.07                    | 141392.31                  |
| 4        | 61.2                     | 15.13                    | 168741.49                  | 4  | 64.77                    | 17.06                    | 189003.66                  |
| 5        | 70.50                    | 9.83                     | 223789.04                  | 5  | 74.94                    | 15.18                    | 252917.50                  |
| 6        | 82.32                    | 25.65                    | 305279.66                  | 6  | 85.03                    | 49.31                    | 325995.57                  |
| 7        | 90.08                    | 12.40                    | 365309.49                  | 7  | 94.63                    | 16.48                    | 403181.90                  |
| 8        | 100.50                   | 20.31                    | 454775.28                  | 8  | 103.70                   | 20.61                    | 484183.98                  |
| 10       | 120.67                   | 18.14                    | 839221.22                  | 10 | 123.45                   | 29.17                    | 686174.82                  |
| 12       | 136.55                   | 11.97                    | 843169.40                  | 12 | 142.81                   | 34.51                    | 918209.95                  |
| 14       | 158.19                   | 13.89                    | 1126263.95                 | 14 | 161.92                   | 18.84                    | 1180058.81                 |
| 16       | 177.11                   | 21.77                    | 141840.86                  | 16 | 182.10                   | 28.01                    | 1492582.58                 |
| 18       | 195.91                   | 12.00                    | 1727288.77                 | 18 | 200.80                   | 29.42                    | 1814811.26                 |
| 20       | 213.76                   | 14.51                    | 2056388.82                 | 20 | 219.95                   | 37.08                    | 2177096.26                 |

F = HCOOH, A = NH<sub>3</sub>, W = H<sub>2</sub>O
